# Supplementary material
Source: PubMed Central journal article supplement (PMC7073871)
Supplement: ml9b00379_si_001.pdf [file ml9b00379_si_001.pdf]

## Structure-Activity Relationship for the Oxadiazole Class of Antibacterials

Marc A. Boudreau<sup>†</sup>, Derong Ding<sup>†</sup>, Jayda E. Meisel<sup>†</sup>, Jeshina Janardhanan<sup>†</sup>, Edward Spink<sup>†</sup>,  
Zhihong Peng<sup>†</sup>, Yuanyuan Qian<sup>†</sup>, Takao Yamaguchi<sup>†</sup>, Sebastian A. Testero<sup>†</sup>, Peter I. O'Daniel<sup>†</sup>,  
Erika Leemans<sup>†</sup>, Elena Lastochkin<sup>†</sup>, Wei Song<sup>†</sup>, Valerie A. Schroeder<sup>‡</sup>, William R. Wolter<sup>‡</sup>,  
Mark A. Suckow<sup>‡</sup>, Shahriar Mobashery<sup>†\*</sup>, and Mayland Chang<sup>†\*</sup>

<sup>†</sup>Department of Chemistry and Biochemistry, University of Notre Dame, Notre Dame, IN 46556,  
USA. <sup>‡</sup>Freimann Life Sciences Center and Department of Biological Sciences, University of  
Notre Dame, Notre Dame, IN 46556, USA.

### Supporting Information

#### Contents

|                                                                                                  |    |
|--------------------------------------------------------------------------------------------------|----|
| General Experimental Procedures for Intermediates .....                                          | 2  |
| Experimental Procedures for Final Compounds .....                                                | 2  |
| Table S1. Spectral Data of Final Compounds.....                                                  | 4  |
| Table S2. Minimal-Inhibitory Concentrations (MICs) .....                                         | 25 |
| Table S3. MRM Transitions for Quantification of Oxadiazoles.....                                 | 28 |
| Table S4. Drug Concentrations in Neutropenic Thigh Infected Mice.....                            | 30 |
| Figure S1. NMR Spectra for Representative Compounds <b>62a</b> , <b>60b</b> and <b>72c</b> ..... | 31 |

## General Experimental Procedures for Intermediates

**Key Intermediates.** The allyl-protected phenols of **8**,<sup>1</sup> **11**,<sup>2</sup> **12**,<sup>3</sup> and **19**,<sup>4</sup> are known compounds and were synthesized using previously described procedures.<sup>5</sup> Compounds **49**, **13**, and **14** were synthesized using previously described procedures.<sup>6,7</sup>

**General procedure for syntheses of benzoyl chlorides.** We followed a general literature method for this purpose.<sup>6</sup>

**General procedure for syntheses of heteroaryl acyl chlorides.** The given carboxylic acid (1.0 equiv.) was dissolved in thionyl chloride (25.0 equiv.), and the mixture was heated to reflux for 2.5 h. The excess thionyl chloride was removed *in vacuo*, and the resulting solid was used without further purification.

**General procedure for syntheses of diphenyl ethers, Method A (nucleophilic aromatic substitution).** A 4-fluorobenzonitrile derivative (1.0 equiv.), a phenol derivative (1.0 equiv.), and K<sub>2</sub>CO<sub>3</sub> (2.0 equiv.) were dissolved in either DMSO or DMF, and the mixture was stirred at 100 °C for 16 h. The mixture was cooled to room temperature and was diluted with water (2× volume of DMSO or DMF used), then it was washed with ethyl acetate (3×). The combined ethyl acetate layer was washed with water (3×), then with brine, and dried (anhydrous Na<sub>2</sub>SO<sub>4</sub>). The suspension was filtered, and the filtrate was concentrated *in vacuo* to dryness. The resulting residue was purified by column chromatography on silica gel.

**General procedure for syntheses of diphenyl ethers, Method B (Ullmann coupling).** We followed a general literature method for this purpose.<sup>6</sup>

**General procedure for syntheses of *N*'-hydroxybenzimidamides.** We followed a general literature method for this purpose.<sup>6</sup>

## Experimental Procedures for Final Compounds

### 4-(3-(4-(4-(Trifluoromethoxy)phenoxy)phenyl)-1,2,4-oxadiazol-5-yl)phenol (**62a**).

4-(Benzyloxy)benzoyl chloride (169 mg, 0.68 mmol) was dissolved in pyridine (15 mL) followed by the addition of (*Z*)-*N*'-hydroxy-4-(4-(trifluoromethoxy)phenoxy)benzimidamide (202 mg, 0.65 mmol). The resulting mixture was stirred under reflux for 23 h. The solvent was removed *in vacuo* and the crude product was purified by silica-gel chromatography (EtOAc/hexane, 1:5) to afford white needle-like crystals (benzyl group protected precursor, 192 mg, 56%).

A portion of the crystals (82 mg, 0.16 mmol) was dissolved in anhydrous DCM (2 mL). The resulting mixture was stirred at -78 °C for 20 min before 1 M BBr<sub>3</sub> in DCM (0.64 mL, 0.32 mmol) was added dropwise. The reaction was quenched with water (13 mL) after 20 min. The mixture was warmed up to room temperature and was washed with DCM (10 mL, 2×). The combined organic layer was evaporated to dryness *in vacuo*. The residue was purified by silica-gel chromatography (EtOAc/hexane, 1:3) to afford **62a** as a white solid (68 mg, > 99%)

Compounds **63a**, **67a**, **68a**, **70a**, **71a**, **73a**, **74a**, **75a**, **76a**, **77a**, **93a**, **94a**, **78a**, **79a**, **80a**, **81a**, **82a**, **83a**, **85a**, **88a**, **89a**, **90a**, **91a**, **95a**, **97a**, **98a**, **99a**, **100a**, **101a**, **103a**, **104a**, **105a**, **107a**, **108a**, **111a**, **112a**, **113a**, **115a**, **117a**, **118a**, **119a**, **120a** and **121a** were synthesized according to the procedure for **62a**; the overall yields ranged from 23% to 74%.

### 5-(4-Chloro-1H-pyrazol-3-yl)-3-(4-(3,4-dichlorophenoxy)phenyl)-1,2,4-oxadiazole (**60b**).

4-Chloro-1H-pyrazole-3-carboxylic acid (108 mg, 0.74 mmol) was dissolved in SOCl<sub>2</sub> (1.5 mL, 14.78 mmol), and the solution was stirred under reflux for 1 h. The excess SOCl<sub>2</sub> was removed *in vacuo*, and the residue was taken up in pyridine (15 mL), followed by the addition of (*Z*)-4-(3,4-

dichlorophenoxy)-*N'*-hydroxybenzimidamide (191 mg, 0.64 mmol). The resulting mixture was stirred under reflux overnight. The solvent was removed *in vacuo* and the residue was purified by silica-gel chromatography (EtOAc/hexane, 1:5) to afford **60b** as a yellow powder (141 mg, 54%).

Compounds **59b**, **61b**, **69b**, **78b**, **85b**, **86b**, **87b**, **92b**, **96b**, **106b**, **109b**, **114b**, **116b**, **120b** and **121b** were synthesized according to the procedure for **60b**; the overall yields ranged from 16% to 66%.

### **3-(4-(4-Fluorophenoxy)phenyl)-5-(1H-indol-5-yl)-1,2,4-oxadiazole (72c).**

A solution of (*Z*)-4-(4-fluorophenoxy)-*N'*-hydroxybenzimidamide (1.00 g, 4.07 mmol) in anhydrous THF (15 mL) was stirred under an atmosphere of argon. Sodium hydride (60% in mineral oil, 0.244 g, 6.10 mmol) was then added to the flask carefully. The mixture was stirred for 1 h at room temperature, and then a solution of methyl 1H-indole-5-carboxylate (0.783 g, 4.48 mmol) in anhydrous THF (20 mL) was added and the mixture was refluxed for 4 h. Once the solution had cooled to room temperature, water (40 mL) was added, and the resulting mixture was washed with ethyl acetate (3 × 40 mL). The combined organic layer was dried over anhydrous Na<sub>2</sub>SO<sub>4</sub> and then filtered, and the filtrate was evaporated to leave a yellow residue. This was purified using column chromatography on silica gel (dichloromethane/hexanes, 5:1) to give **72c** as a white solid (498 mg, 33%).

Compound **78c** was synthesized according to the procedure for **72c** to afford **78c** as a white solid (626 mg, 40%).

**Deprotection of the Boc group.** Compounds **108b** and **117b** were synthesized from their Boc-protected precursors. Hydrochloric acid (4 M in dioxane) was added to the solution of precursor in DCM. The mixture was stirred at room temperature for 30 min, then the solvent was removed *in vacuo* to give the final product.

**Acylation using acetic anhydride.** Compounds **102a** and **110a** were synthesized from **101a** and **108a**, respectively, by following a literature method.<sup>8</sup>

**Nitro reduction using SnCl<sub>2</sub>·H<sub>2</sub>O.** Aniline **84a** was synthesized from **71a** by following a literature method.<sup>8</sup>

**Introduction of azides (64a, 65a, 66a).** Azides **64a** and **65a** were synthesized from the corresponding aryl iodides by following a literature method.<sup>5</sup> We synthesized azide **66a** from the corresponding aniline by following a literature method.<sup>9</sup>

**Table S1. Spectral Data of Final Compounds**

| Compound Number     | Structure and data                                                                                                                                                                                                                                                                                                                                   |
|---------------------|------------------------------------------------------------------------------------------------------------------------------------------------------------------------------------------------------------------------------------------------------------------------------------------------------------------------------------------------------|
| <b>59b</b>          | 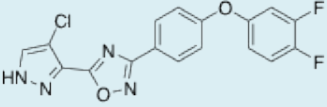                                                                                                                                                                                                                                                                   |
| <sup>1</sup> H NMR  | (500 MHz, DMSO- <i>d</i> <sub>6</sub> ) δ 7.00–7.02 (m, 1H, ArH), 7.21 (d, 2H, <i>J</i> = 8.6 Hz, ArH), 7.35–7.39 (m, 1H, ArH), 7.49–7.54 (m, 1H, ArH), 8.08 (d, 2H, <i>J</i> = 8.1 Hz, ArH), 8.36 (s, 1H, ArH).                                                                                                                                     |
| <sup>13</sup> C NMR | (100 MHz, DMSO- <i>d</i> <sub>6</sub> ) δ 110.3, 110.5, 116.9 (dd, 1C, <i>J</i> <sub>CF</sub> = 3.5, 6.5 Hz), 118.8, 118.9, 119.0, 121.6, 122.3, 129.8, 130.8, 147.0 (dd, 1C, <i>J</i> <sub>CF</sub> = 12.6, 242.1 Hz), 150.3 (dd, 1C, <i>J</i> <sub>CF</sub> = 14.0, 247.5 Hz), 152.1 (dd, 1C, <i>J</i> <sub>CF</sub> = 2.9, 8.8 Hz), 160.0, 167.9. |
| <sup>19</sup> F NMR | (376 MHz, DMSO- <i>d</i> <sub>6</sub> ) δ -143.6 (d, 1F, <i>J</i> = 22.7 Hz), -134.8 (d, 1F, <i>J</i> = 23.0 Hz)                                                                                                                                                                                                                                     |
| HRMS (ESI)          | calcd for C <sub>17</sub> H <sub>10</sub> ClF <sub>2</sub> N <sub>4</sub> O <sub>2</sub> , 375.0455, found 375.0461 [MH] <sup>+</sup>                                                                                                                                                                                                                |
| <b>60b</b>          |                                                                                                                                                                                                                                                                   |
| <sup>1</sup> H NMR  | (500 MHz, DMSO- <i>d</i> <sub>6</sub> ) δ 7.15–7.17 (m, 1H, ArH), 7.27 (d, 2H, <i>J</i> = 8.5 Hz, ArH), 7.49 (d, 1H, <i>J</i> = 2.0 Hz, ArH), 7.70 (d, 1H, <i>J</i> = 9.0 Hz, ArH), 8.12 (d, 2H, <i>J</i> = 9.0 Hz, ArH), 8.38 (s, 1H, ArH).                                                                                                         |
| <sup>13</sup> C NMR | (125 MHz, DMSO- <i>d</i> <sub>6</sub> ) δ 110.1, 119.1, 119.7, 121.5, 121.6, 126.4, 129.4, 130.2, 131.7, 132.2, 133.4, 155.1, 158.7, 167.3, 169.4.                                                                                                                                                                                                   |
| HRMS (ESI)          | calcd for C <sub>17</sub> H <sub>10</sub> Cl <sub>3</sub> N <sub>4</sub> O <sub>2</sub> , 406.9864, found 406.9876 [MH] <sup>+</sup>                                                                                                                                                                                                                 |
| <b>61b</b>          |                                                                                                                                                                                                                                                                  |
| <sup>1</sup> H NMR  | (500 MHz, DMSO- <i>d</i> <sub>6</sub> ) δ 6.97 (d, 2H, <i>J</i> = 8.5 Hz, ArH), 7.21 (d, 2H, <i>J</i> = 8.5 Hz, ArH), 7.77 (d, 2H, <i>J</i> = 8.5 Hz, ArH), 8.09 (d, 2H, <i>J</i> = 8.5 Hz, ArH), 8.37 (s, 1H, ArH).                                                                                                                                 |
| <sup>13</sup> C NMR | (125 MHz, DMSO- <i>d</i> <sub>6</sub> ) δ 88.2, 110.0, 118.7, 121.0, 121.9, 129.3, 129.5, 130.2, 133.4, 138.9, 155.5, 159.1, 167.4.                                                                                                                                                                                                                  |
| HRMS (ESI)          | calcd for C <sub>17</sub> H <sub>11</sub> ClIN <sub>4</sub> O <sub>2</sub> , 464.9615, found 464.9633 [MH] <sup>+</sup>                                                                                                                                                                                                                              |

|                     |                                                                                                                                                                                                                                                                               |
|---------------------|-------------------------------------------------------------------------------------------------------------------------------------------------------------------------------------------------------------------------------------------------------------------------------|
| <b>62a</b>          | 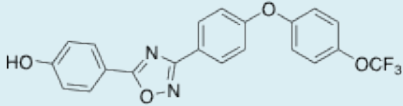                                                                                                                                                                                            |
| <sup>1</sup> H NMR  | (600 MHz, CD <sub>3</sub> OD) δ 6.97 (d, 2H, <i>J</i> = 9.0 Hz, ArH), 7.15 (d, 2H, <i>J</i> = 8.8 Hz, ArH), 7.17 (d, 2H, <i>J</i> = 9.1 Hz, ArH), 7.34 (d, 2H, <i>J</i> = 9.1 Hz, ArH), 8.06 (d, 2H, <i>J</i> = 9.0 Hz, ArH), 8.13 (d, 2H, <i>J</i> = 8.8 Hz, ArH).           |
| <sup>13</sup> C NMR | (150 MHz, CD <sub>3</sub> OD) δ 116.5, 117.3, 119.8, 122.0, 122.1 (q, 1C, <i>J</i> <sub>CF</sub> = 255.3 Hz), 123.7, 124.2, 130.5, 131.4, 146.6, 156.6, 161.2, 163.6, 169.4, 177.5                                                                                            |
| HRMS (ESI)          | calcd for C <sub>21</sub> H <sub>14</sub> F <sub>3</sub> N <sub>2</sub> O <sub>4</sub> 415.0900, found 415.0899 [MH] <sup>+</sup>                                                                                                                                             |
| <b>63a</b>          |                                                                                                                                                                                             |
| <sup>1</sup> H NMR  | (400 MHz, DMSO- <i>d</i> <sub>6</sub> ) δ 7.00 (d, 2H, <i>J</i> = 8.9 Hz, ArH), 7.11 (d, 2H, <i>J</i> = 8.9 Hz, ArH), 7.19 (d, 2H, <i>J</i> = 8.9 Hz, ArH), 7.63 (d, 2H, <i>J</i> = 8.9 Hz, ArH), 8.02 (d, 2H, <i>J</i> = 8.9 Hz, ArH), 8.08 (d, 2H, <i>J</i> = 8.9 Hz, ArH). |
| <sup>13</sup> C NMR | (100 MHz, DMSO- <i>d</i> <sub>6</sub> ) δ 114.1, 116.2, 116.3, 118.7, 121.5, 121.8, 129.3, 130.2, 133.1, 155.0, 159.2, 162.1, 167.5, 175.5.                                                                                                                                   |
| HRMS (ESI)          | calcd for C <sub>20</sub> H <sub>14</sub> BrN <sub>2</sub> O <sub>3</sub> 409.0182, found 409.0155 [MH] <sup>+</sup>                                                                                                                                                          |
| <b>64a</b>          |                                                                                                                                                                                           |
| <sup>1</sup> H NMR  | (500 MHz, DMSO- <i>d</i> <sub>6</sub> ) δ 7.00 (d, 2H, <i>J</i> = 9.0 Hz, ArH), 7.16 (d, 2H, <i>J</i> = 9.0 Hz, ArH), 7.20–7.22 (m, 4H, ArH), 8.03 (d, 2H, <i>J</i> = 9.0 Hz, ArH), 8.07 (d, 2H, <i>J</i> = 9.0 Hz, ArH), 10.55 (s, 1H, OH).                                  |
| <sup>13</sup> C NMR | (150 MHz, DMSO- <i>d</i> <sub>6</sub> ) δ 114.1, 116.3, 118.1, 120.9, 121.1, 121.5, 129.2, 130.1, 135.4, 152.5, 159.8, 162.1, 167.5, 175.4.                                                                                                                                   |
| HRMS (ESI)          | calcd for C <sub>20</sub> H <sub>14</sub> N <sub>5</sub> O <sub>3</sub> 372.1091, found 372.1082 [MH] <sup>+</sup>                                                                                                                                                            |
| <b>65a</b>          |                                                                                                                                                                                           |
| <sup>1</sup> H NMR  | (500 MHz, CDCl <sub>3</sub> ) δ 5.36 (s, 1H, OH), 6.74 (t, 1H, <i>J</i> = 2.3 Hz, ArH), 6.83–6.86 (m, 2H, ArH), 6.99 (d, 2H, <i>J</i> = 8.8 Hz, ArH), 7.12 (d, 2H, <i>J</i> = 9.0 Hz, ArH), 7.35 (t, 1H, <i>J</i> = 8.1 Hz, ArH), 8.11–8.16 (m, 4H, ArH).                     |
| <sup>13</sup> C NMR | (125 MHz, CDCl <sub>3</sub> ) δ 110.6, 114.7, 116.0, 116.4, 116.9, 119.1, 122.3, 129.5, 130.6, 131.1, 142.0, 157.8, 159.6, 160.1, 168.4, 175.8.                                                                                                                               |
| HRMS (ESI)          | calcd for C <sub>20</sub> H <sub>14</sub> N <sub>5</sub> O <sub>3</sub> 372.1091, found 372.1093 [MH] <sup>+</sup>                                                                                                                                                            |

|                     |                                                                                                                                                                                                                                                                                                                                                                                                       |
|---------------------|-------------------------------------------------------------------------------------------------------------------------------------------------------------------------------------------------------------------------------------------------------------------------------------------------------------------------------------------------------------------------------------------------------|
| <b>66a</b>          | 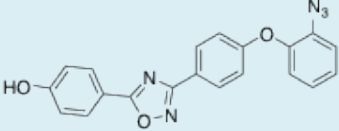                                                                                                                                                                                                                                                                                                                    |
| <sup>1</sup> H NMR  | (500 MHz, acetone- <i>d</i> <sub>6</sub> ) δ 7.09 (d, 2H, <i>J</i> = 8.9 Hz, ArH), 7.11 (d, 2H, <i>J</i> = 9.0 Hz, ArH), 7.20 (ddd, 1H, <i>J</i> = 8.0, 1.4, 0.4 Hz, ArH), 7.27–7.36 (m, 3H, ArH), 8.10 (d, 2H, <i>J</i> = 8.9 Hz, ArH), 8.14 (d, 2H, <i>J</i> = 9.0 Hz, ArH), 9.37 (s, 1H, OH).                                                                                                      |
| <sup>13</sup> C NMR | (125 MHz, acetone- <i>d</i> <sub>6</sub> ) δ 113.3, 117.1, 117.9, 122.3, 122.8, 123.5, 127.2, 127.3, 130.1, 131.1, 133.2, 147.6, 161.2, 162.7, 168.9, 176.7.                                                                                                                                                                                                                                          |
| HRMS (ESI)          | calcd for C <sub>20</sub> H <sub>14</sub> N <sub>5</sub> O <sub>3</sub> 372.1091, found 372.1106 [MH] <sup>+</sup>                                                                                                                                                                                                                                                                                    |
| <b>67a</b>          |                                                                                                                                                                                                                                                                                                                     |
| <sup>1</sup> H NMR  | (500 MHz, CDCl <sub>3</sub> ) δ 6.76 (s, 1H, OH), 6.95 (ddd, 1H, <i>J</i> = 8.0, 7.4, 1.6 Hz, ArH), 8.98 (d, 2H, <i>J</i> = 8.8 Hz, ArH), 7.03 (dd, 1H, <i>J</i> = 8.0, 1.6 Hz, ArH), 7.04 (d, 2H, <i>J</i> = 9.0 Hz, ArH), 7.35 (ddd, 1H, <i>J</i> = 8.1, 7.4, 1.6 Hz, ArH), 7.89 (dd, 1H, <i>J</i> = 8.1, 1.6 Hz, ArH), 8.09 (d, 2H, <i>J</i> = 8.8 Hz, ArH), 8.12 (d, 2H, <i>J</i> = 9.0 Hz, ArH). |
| <sup>13</sup> C NMR | (125 MHz, CDCl <sub>3</sub> ) δ 89.8, 116.4, 116.8, 118.1, 121.0, 121.8, 126.5, 129.6, 130.1, 130.6, 140.3, 155.6, 159.8, 160.2, 168.4, 175.8.                                                                                                                                                                                                                                                        |
| HRMS (ESI)          | calcd for C <sub>20</sub> H <sub>14</sub> IN <sub>2</sub> O <sub>3</sub> 457.0044, found 457.0020 [MH] <sup>+</sup>                                                                                                                                                                                                                                                                                   |
| <b>68a</b>          |                                                                                                                                                                                                                                                                                                                   |
| <sup>1</sup> H NMR  | (600 MHz, CDCl <sub>3</sub> ) δ 5.44 (s, 1H, OH), 3.83 (s, 3H, OCH <sub>3</sub> ), 6.93 (d, 2H, <i>J</i> = 9.0 Hz, ArH), 6.98 (d, 2H, <i>J</i> = 8.8 Hz, ArH), 7.03 (d, 2H, <i>J</i> = 8.8 Hz, ArH), 7.05 (d, 2H, <i>J</i> = 9.0 Hz, ArH), 8.09 (d, 2H, <i>J</i> = 8.8 Hz, ArH), 8.12 (d, 2H, <i>J</i> = 8.8 Hz, ArH).                                                                                |
| <sup>13</sup> C NMR | (125 MHz, CD <sub>3</sub> OD) δ 56.2, 116.3, 116.6, 117.2, 118.3, 122.3, 122.7, 130.3, 131.3, 150.4, 158.3, 162.9, 163.6, 169.5, 177.4.                                                                                                                                                                                                                                                               |
| HRMS (ESI)          | calcd for C <sub>21</sub> H <sub>16</sub> N <sub>2</sub> NaO <sub>4</sub> 383.1002, found 383.1022 [MNa] <sup>+</sup>                                                                                                                                                                                                                                                                                 |

|                     |                                                                                                                                                                                                                                                                                                                                                                                     |
|---------------------|-------------------------------------------------------------------------------------------------------------------------------------------------------------------------------------------------------------------------------------------------------------------------------------------------------------------------------------------------------------------------------------|
| <b>69b</b>          | 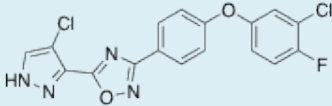                                                                                                                                                                                                                                                                                                  |
| <sup>1</sup> H NMR  | (500 MHz, DMSO- <i>d</i> <sub>6</sub> ) δ 7.18–7.22 (m, 3H, ArH), 7.48–7.53 (m, 2H, ArH), 8.09 (d, 2H, <i>J</i> = 7.0 Hz, ArH), 8.38 (s, 1H, ArH).                                                                                                                                                                                                                                  |
| <sup>13</sup> C NMR | (100 MHz, DMSO- <i>d</i> <sub>6</sub> ) δ 110.6, 118.5 (d, 1C, <i>J</i> <sub>CF</sub> = 22.7 Hz), 118.9, 120.9 (d, 1C, <i>J</i> <sub>CF</sub> = 7.6 Hz), 121.1, 121.6, 122.5, 129.8, 130.7, 133.9, 152.3 (d, 1C, <i>J</i> <sub>CF</sub> = 2.7 Hz), 154.7 (d, 1C, <i>J</i> <sub>CF</sub> = 243.1 Hz), 160.0, 167.9, 169.9.                                                           |
| <sup>19</sup> F NMR | (376 MHz, DMSO- <i>d</i> <sub>6</sub> ) δ -121.68 (s, 1F).                                                                                                                                                                                                                                                                                                                          |
| HRMS (ESI)          | calcd for C <sub>17</sub> H <sub>10</sub> Cl <sub>2</sub> FN <sub>4</sub> O <sub>2</sub> , 390.0159, found 390.0148 [MH] <sup>+</sup>                                                                                                                                                                                                                                               |
| <b>70a</b>          |                                                                                                                                                                                                                                                                                                   |
| <sup>1</sup> H NMR  | (400 MHz, CDCl <sub>3</sub> ) δ 6.02 (s, 1H, OH), 6.99 (d, 2H, <i>J</i> = 8.9 Hz, ArH), 7.14 (d, 2H, <i>J</i> = 9.1 Hz, ArH), 7.42 (dd, 1H, <i>J</i> = 8.0, 1.2 Hz, ArH), 7.57 (t, 1H, <i>J</i> = 8.0 Hz, ArH), 7.77 (s, 1H, ArH), 7.87 (dd, 1H, <i>J</i> = 8.0, 1.2 Hz, ArH), 8.12 (d, 2H, <i>J</i> = 8.9 Hz, ArH), 8.18 (d, 2H, <i>J</i> = 9.1 Hz, ArH).                          |
| <sup>13</sup> C NMR | (100 MHz, CDCl <sub>3</sub> ) δ 116.3, 117.1, 119.3, 120.4, 123.0, 125.7, 126.5, 129.8, 130.6, 131.0, 131.8, 158.9, 160.0, 160.5, 168.3, 175.9.                                                                                                                                                                                                                                     |
| HRMS (ESI)          | calcd for C <sub>22</sub> H <sub>14</sub> F <sub>3</sub> N <sub>2</sub> O <sub>4</sub> 427.0900, found 427.0883 [MH] <sup>+</sup>                                                                                                                                                                                                                                                   |
| <b>71a</b>          |                                                                                                                                                                                                                                                                                                 |
| <sup>1</sup> H NMR  | (500 MHz, CD <sub>3</sub> OD) δ 6.96 (d, 2H, <i>J</i> = 8.8 Hz, ArH), 7.13 (d, 2H, <i>J</i> = 8.9 Hz, ArH), 7.24 (dd, 1H, <i>J</i> = 8.4, 1.2 Hz, ArH), 7.39 (ddd, 1H, <i>J</i> = 8.4, 7.6, 1.2 Hz, ArH), 7.68 (ddd, 1H, <i>J</i> = 8.2, 7.6, 1.7 Hz, ArH), 8.02 (dd, 1H, <i>J</i> = 8.2, 1.7 Hz, ArH), 8.03 (d, 2H, <i>J</i> = 8.8 Hz, ArH), 8.11 (d, 2H, <i>J</i> = 8.9 Hz, ArH). |
| <sup>13</sup> C NMR | (125 MHz, CD <sub>3</sub> OD) δ 116.5, 117.3, 119.4, 123.7, 124.2, 126.2, 127.0, 130.6, 131.4, 135.9, 143.8, 150.2, 160.7, 163.7, 169.4, 177.5.                                                                                                                                                                                                                                     |
| HRMS (ESI)          | calcd for C <sub>20</sub> H <sub>14</sub> N <sub>3</sub> O <sub>5</sub> 376.0928, found 376.0932 [MH] <sup>+</sup>                                                                                                                                                                                                                                                                  |

|                     |                                                                                                                                                                                                                                                                                                                                                                                                |
|---------------------|------------------------------------------------------------------------------------------------------------------------------------------------------------------------------------------------------------------------------------------------------------------------------------------------------------------------------------------------------------------------------------------------|
| <b>72c</b>          | 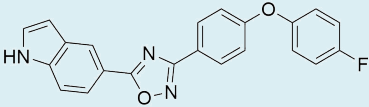                                                                                                                                                                                                                                                                                                             |
| <sup>1</sup> H NMR  | (400 MHz, DMSO- <i>d</i> <sub>6</sub> ) δ 6.66–6.71 (m, 1H, ArH), 7.16 (d, <i>J</i> = 8.8 Hz, 2H, ArH), 7.19–7.26 (m, 2H, ArH), 7.31 (t, <i>J</i> = 8.8 Hz, 2H, ArH), 7.55 (t, <i>J</i> = 2.7 Hz, 1H, ArH), 7.63 (d, <i>J</i> = 8.6 Hz, 1H, ArH), 7.91 (dd, <i>J</i> = 8.6, 1.6 Hz, 1H, ArH), 8.11 (d, <i>J</i> = 8.9 Hz, 2H, ArH), 8.44–8.50 (m, 1H, ArH), 11.64 (s, 1H, NH).                 |
| <sup>13</sup> C NMR | (125 MHz, DMSO- <i>d</i> <sub>6</sub> ) δ 102.7, 112.5, 114.2, 116.9 (d, 2C, <i>J</i> <sub>CF</sub> = 23.5 Hz), 117.8, 120.6, 121.2, 121.3, 121.8 (d, 2C, <i>J</i> <sub>CF</sub> = 8.6 Hz), 127.8 (2C), 129.2, 138.4, 151.4 (d, 1C, <i>J</i> <sub>CF</sub> = 1.7 Hz), 158.8 (d, 1C, <i>J</i> <sub>CF</sub> = 240.6 Hz), 160.0, 167.6, 176.9.                                                   |
| <sup>19</sup> F NMR | (376 MHz, DMSO- <i>d</i> <sub>6</sub> ) δ -118.5 (s, 1F)                                                                                                                                                                                                                                                                                                                                       |
| HRMS (ESI)          | calcd for C <sub>22</sub> H <sub>15</sub> FN <sub>3</sub> O <sub>2</sub> 372.1148, found 372.1166 [MH] <sup>+</sup>                                                                                                                                                                                                                                                                            |
| <b>73a</b>          |                                                                                                                                                                                                                                                                                                             |
| <sup>1</sup> H NMR  | (400 MHz, CDCl <sub>3</sub> ) δ 6.99 (d, 2H, <i>J</i> = 8.9 Hz, ArH), 6.99–7.02 (m, 1H, ArH), 7.11 (d, 2H, <i>J</i> = 8.7 Hz, ArH), 7.22–7.24 (m, 2H, ArH), 7.28 (dt, 1H, <i>J</i> = 8.2, 1.5 Hz, ArH), 8.11 (d, 2H, <i>J</i> = 8.9 Hz, ArH), 8.14 (d, 2H, <i>J</i> = 8.7 Hz, ArH).                                                                                                            |
| <sup>13</sup> C NMR | (150 MHz, CDCl <sub>3</sub> ) δ 116.4, 116.6, 118.3, 119.1, 122.4, 122.8, 123.2, 127.3, 129.6, 130.6, 131.2, 157.3, 159.4, 160.4, 168.3, 175.9                                                                                                                                                                                                                                                 |
| HRMS (ESI)          | calcd for C <sub>20</sub> H <sub>13</sub> BrN <sub>2</sub> NaO <sub>3</sub> 431.0002, found 431.0005 [MNa] <sup>+</sup>                                                                                                                                                                                                                                                                        |
| <b>74a</b>          |                                                                                                                                                                                                                                                                                                            |
| <sup>1</sup> H NMR  | (500 MHz, DMSO- <i>d</i> <sub>6</sub> ) δ 6.99 (d, 2H, <i>J</i> = 8.8 Hz, ArH), 7.15 (dd, 1H, <i>J</i> = 8.1, 2.3 Hz, ArH), 7.19 (d, 2H, <i>J</i> = 8.9 Hz, ArH), 7.24 (t, 1H, <i>J</i> = 8.1 Hz, ArH), 7.48 (dd, 1H, <i>J</i> = 2.3, 1.6 Hz, ArH), 7.58 (dd, 1H, <i>J</i> = 8.1, 1.6 Hz, ArH), 8.02 (d, 2H, <i>J</i> = 8.8 Hz, ArH), 8.08 (d, 2H, <i>J</i> = 8.9 Hz, ArH), 10.57 (s, 1H, OH). |
| <sup>13</sup> C NMR | (125 MHz, DMSO- <i>d</i> <sub>6</sub> ) δ 95.3, 114.1, 116.3, 118.9, 119.0, 121.7, 127.9, 129.2, 130.1, 132.1, 133.1, 136.4, 158.9, 162.1, 167.5, 175.5.                                                                                                                                                                                                                                       |
| HRMS (ESI)          | calcd for C <sub>20</sub> H <sub>13</sub> IN <sub>2</sub> NaO <sub>3</sub> 478.9863, found 478.9873 [MNa] <sup>+</sup>                                                                                                                                                                                                                                                                         |



|                     |                                                                                                                                                                                                                                                                                                                                                                                                                 |
|---------------------|-----------------------------------------------------------------------------------------------------------------------------------------------------------------------------------------------------------------------------------------------------------------------------------------------------------------------------------------------------------------------------------------------------------------|
| <b>75a</b>          | 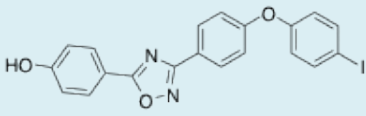                                                                                                                                                                                                                                                                                                                              |
| <sup>1</sup> H NMR  | (500 MHz, DMSO- <i>d</i> <sub>6</sub> ) δ 6.96 (d, 2H, <i>J</i> = 8.5 Hz, ArH), 6.99 (d, 2H, <i>J</i> = 8.6 Hz, ArH), 7.18 (d, 2H, <i>J</i> = 8.7 Hz, ArH), 7.77 (d, 2H, <i>J</i> = 8.7 Hz, ArH), 8.02 (d, 2H, <i>J</i> = 8.5 Hz, ArH), 8.07 (d, 2H, <i>J</i> = 8.6 Hz, ArH), 10.57 (s, 1H, OH).                                                                                                                |
| <sup>13</sup> C NMR | (125 MHz, DMSO- <i>d</i> <sub>6</sub> ) δ 88.3, 114.1, 116.3, 118.7, 121.5, 122.0, 129.2, 130.1, 138.9, 155.6, 159.1, 162.1, 167.5, 175.5.                                                                                                                                                                                                                                                                      |
| HRMS (ESI)          | calcd for C <sub>20</sub> H <sub>14</sub> IN <sub>2</sub> O <sub>3</sub> 457.0044, found 457.0029 [MH] <sup>+</sup>                                                                                                                                                                                                                                                                                             |
| <b>76a</b>          |                                                                                                                                                                                                                                                                                                                               |
| <sup>1</sup> H NMR  | (600 MHz, CDCl <sub>3</sub> ) δ 4.58 (s, 2H, CH <sub>2</sub> Br), 5.94 (s, 1H, OH), 6.95 (d, 1H, <i>J</i> = 8.4 Hz, ArH), 6.99 (d, 2H, <i>J</i> = 8.5 Hz, ArH), 7.12 (d, 2H, <i>J</i> = 8.8 Hz, ArH), 7.17 (t, 1H, <i>J</i> = 7.4 Hz, ArH), 7.31 (td, 1H, <i>J</i> = 8.5, 1.3 Hz, ArH), 7.49 (dd, 1H, <i>J</i> = 7.4, 1.3 Hz, ArH), 8.11 (d, 2H, <i>J</i> = 8.8 Hz, ArH), 8.14 (d, 2H, <i>J</i> = 8.5 Hz, ArH). |
| <sup>13</sup> C NMR | (125 MHz, CDCl <sub>3</sub> ) δ 28.0, 116.3, 117.1, 118.7, 120.0, 122.2, 124.8, 129.6, 129.7, 130.5, 130.6, 131.7, 149.7, 154.5, 160.0, 168.5, 175.7.                                                                                                                                                                                                                                                           |
| HRMS (ESI)          | calcd for C <sub>21</sub> H <sub>16</sub> BrN <sub>2</sub> O <sub>3</sub> 423.0339, found 423.0337 [MH] <sup>+</sup>                                                                                                                                                                                                                                                                                            |
| <b>77a</b>          |                                                                                                                                                                                                                                                                                                                             |
| <sup>1</sup> H NMR  | (500 MHz, CD <sub>3</sub> OD) δ 4.57 (s, 2H, CH <sub>2</sub> Br), 6.97 (d, 2H, <i>J</i> = 8.9 Hz, ArH), 7.03 (ddd, 1H, <i>J</i> = 7.9, 2.2, 1.2 Hz, ArH), 7.13 (d, 2H, <i>J</i> = 8.9 Hz, ArH), 7.16 (t, 1H, <i>J</i> = 2.2 Hz, ArH), 7.26 (dt, 1H, <i>J</i> = 7.9, 1.2 Hz, ArH), 7.40 (t, 1H, <i>J</i> = 7.9 Hz, ArH), 8.06 (d, 2H, <i>J</i> = 8.9 Hz, ArH), 8.12 (d, 2H, <i>J</i> = 8.9 Hz, ArH).             |
| <sup>13</sup> C NMR | (125 MHz, CD <sub>3</sub> OD) δ 79.6, 116.5, 117.3, 119.7, 120.7, 121.4, 123.4, 126.1, 130.5, 131.4, 131.6, 142.2, 157.9, 161.5, 163.6, 169.5, 177.5.                                                                                                                                                                                                                                                           |
| HRMS (ESI)          | calcd for C <sub>21</sub> H <sub>16</sub> BrN <sub>2</sub> O <sub>3</sub> 423.0339, found 423.0316 [MH] <sup>+</sup>                                                                                                                                                                                                                                                                                            |

|                     |                                                                                                                                                                                                                                                                                                                                                                                                                      |
|---------------------|----------------------------------------------------------------------------------------------------------------------------------------------------------------------------------------------------------------------------------------------------------------------------------------------------------------------------------------------------------------------------------------------------------------------|
| <b>93a</b>          | 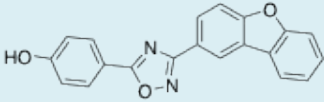                                                                                                                                                                                                                                                                                                                                   |
| <sup>1</sup> H NMR  | (500 MHz, DMSO- <i>d</i> <sub>6</sub> ) δ 7.00 (d, 2H, <i>J</i> = 8.2 Hz, ArH), 7.41 (t, 1H, <i>J</i> = 7.4 Hz, ArH), 7.54 (d, 1H, <i>J</i> = 7.4 Hz, ArH), 7.69 (d, 1H, <i>J</i> = 7.8 Hz, ArH), 7.81 (d, 1H, <i>J</i> = 8.5 Hz, ArH), 8.02 (d, 2H, <i>J</i> = 8.2 Hz, ArH), 8.16 (d, 1H, <i>J</i> = 8.5 Hz, ArH), 8.26 (d, 1H, <i>J</i> = 7.8 Hz, ArH), 8.77 (s, 1H, ArH), 10.56 (br s, 1H, OH).                   |
| <sup>13</sup> C NMR | (125 MHz, DMSO- <i>d</i> <sub>6</sub> ) δ 111.8, 112.4, 114.2, 116.3, 120.2, 121.6, 121.7, 123.0, 123.5, 124.3, 126.5, 128.2, 130.1, 156.0, 162.0, 168.0, 175.5.                                                                                                                                                                                                                                                     |
| HRMS (ESI)          | calcd for C <sub>20</sub> H <sub>13</sub> N <sub>2</sub> O <sub>3</sub> 329.0926, found 329.0908 [MH] <sup>+</sup>                                                                                                                                                                                                                                                                                                   |
| <b>94a</b>          |                                                                                                                                                                                                                                                                                                                                    |
| <sup>1</sup> H NMR  | (600 MHz, CDCl <sub>3</sub> ) δ 7.03 (d, 2H, <i>J</i> = 8.5 Hz, ArH), 7.94 (d, 1H, <i>J</i> = 9.0 Hz, ArH), 7.98–8.00 (m, 2H, ArH), 8.08 (d, 2H, <i>J</i> = 8.5 Hz, ArH), 8.31 (d, 1H, <i>J</i> = 9.0 Hz, ArH), 8.94 (s, 1H, ArH), 9.10 (s, 1H, ArH), 10.60 (s, 1H, OH).                                                                                                                                             |
| <sup>13</sup> C NMR | (150 MHz, DMSO- <i>d</i> <sub>6</sub> ) δ 112.9 (d, 1C, <i>J</i> <sub>CF</sub> = 0.4 Hz), 114.2, 116.4, 120.1 (d, 1C, <i>J</i> <sub>CF</sub> = 3.9 Hz), 121.4, 122.3, 123.6, 123.8, 124.6 (q, 1C, <i>J</i> <sub>CF</sub> = 31.7 Hz), 124.6 (q, <i>J</i> <sub>CF</sub> = 272.1 Hz), 125.3 (d, <i>J</i> <sub>CF</sub> = 3.4 Hz), 127.7, 130.2, 157.7 (d, <i>J</i> <sub>CF</sub> = 1.2 Hz), 157.7, 162.1, 168.0, 175.6. |
| <sup>19</sup> F NMR | (282 MHz, acetone- <i>d</i> <sub>6</sub> ) δ -61.7 (s, 3F).                                                                                                                                                                                                                                                                                                                                                          |
| HRMS (ESI)          | calcd for C <sub>21</sub> H <sub>10</sub> F <sub>3</sub> N <sub>2</sub> O <sub>3</sub> 395.0649, found 395.0656 [M-H] <sup>-</sup>                                                                                                                                                                                                                                                                                   |
| <b>78a</b>          |                                                                                                                                                                                                                                                                                                                                  |
| <sup>1</sup> H NMR  | (600 MHz, CD <sub>3</sub> OD) δ 6.89 (d, 2H, <i>J</i> = 9.0 Hz, ArH), 7.38 (d, 2H, <i>J</i> = 8.5 Hz, ArH), 7.91 (d, 2H, <i>J</i> = 9.0 Hz, ArH), 8.06 (d, 2H, <i>J</i> = 8.5 Hz, ArH).                                                                                                                                                                                                                              |
| <sup>13</sup> C NMR | (100 MHz, CD <sub>3</sub> OD) δ 116.4, 116.5, 121.6, 121.8 (q, 1C, <i>J</i> <sub>CF</sub> = 256.4 Hz), 130.3, 131.9, 133.0, 152.2, 158.6, 163.7, 166.5.                                                                                                                                                                                                                                                              |
| <sup>19</sup> F NMR | (282 MHz, CD <sub>3</sub> OD) δ -60.8 (s, 3F).                                                                                                                                                                                                                                                                                                                                                                       |
| HRMS (ESI)          | calcd for C <sub>15</sub> H <sub>10</sub> F <sub>3</sub> N <sub>2</sub> O <sub>3</sub> 323.0638, found 323.0635 [MH] <sup>+</sup>                                                                                                                                                                                                                                                                                    |

|                     |                                                                                                                                                                                                                                                                                                                                                                                                      |
|---------------------|------------------------------------------------------------------------------------------------------------------------------------------------------------------------------------------------------------------------------------------------------------------------------------------------------------------------------------------------------------------------------------------------------|
| <b>79a</b>          |                                                                                                                                                                                                                                                                                                                                                                                                      |
| <sup>1</sup> H NMR  | (600 MHz, acetone- <i>d</i> <sub>6</sub> ) δ 6.93 (d, 2H, <i>J</i> = 9.1 Hz, ArH), 7.01 (d, 2H, <i>J</i> = 9.1 Hz, ArH), 7.06 (d, 2H, <i>J</i> = 8.8 Hz, ArH), 7.08 (d, 2H, <i>J</i> = 8.8 Hz, ArH), 8.08 (d, 2H, <i>J</i> = 8.8 Hz, ArH), 8.09 (d, 2H, <i>J</i> = 8.8 Hz, ArH), 8.83 (br s, 2H, OH).                                                                                                |
| <sup>13</sup> C NMR | (150 MHz, acetone- <i>d</i> <sub>6</sub> ) δ 116.6, 117.1, 117.3, 117.9, 121.9, 122.6, 129.9, 131.0, 148.9, 155.4, 162.6, 162.7, 169.0, 176.6.                                                                                                                                                                                                                                                       |
| HRMS (ESI)          | calcd for C <sub>20</sub> H <sub>14</sub> N <sub>2</sub> NaO <sub>4</sub> 369.0846, found 369.0835 [MH] <sup>+</sup>                                                                                                                                                                                                                                                                                 |
| <b>80a</b>          |                                                                                                                                                                                                                                                                                                                                                                                                      |
| <sup>1</sup> H NMR  | (500 MHz, acetone- <i>d</i> <sub>6</sub> ) δ 7.08 (d, 2H, <i>J</i> = 8.8 Hz, ArH), 7.18 (d, 2H, <i>J</i> = 8.0 Hz, ArH), 7.27 (d, 2H, <i>J</i> = 8.2 Hz, ArH), 8.09–8.11 (m, 4H, ArH), 8.20 (d, 2H, <i>J</i> = 8.2 Hz, ArH).                                                                                                                                                                         |
| <sup>13</sup> C NMR | (125 MHz, acetone- <i>d</i> <sub>6</sub> ) δ 116.5, 117.1, 119.3, 120.7, 124.1, 127.0, 130.3, 131.1, 133.0, 142.5, 159.6, 161.6, 162.8, 168.9, 176.8.                                                                                                                                                                                                                                                |
| HRMS (ESI)          | calcd for C <sub>21</sub> H <sub>15</sub> N <sub>2</sub> O <sub>5</sub> 375.0975, found 375.0956 [MH] <sup>+</sup>                                                                                                                                                                                                                                                                                   |
| <b>81a</b>          |                                                                                                                                                                                                                                                                                                                                                                                                      |
| <sup>1</sup> H NMR  | (500 MHz, DMSO- <i>d</i> <sub>6</sub> ) δ 6.99 (d, 2H, <i>J</i> = 8.8 Hz, ArH), 7.23 (d, 2H, <i>J</i> = 8.9 Hz, ArH), 7.42 (ddd, 1H, <i>J</i> = 7.9, 2.4, 1.2 Hz, ArH), 7.55 (dd, 1H, <i>J</i> = 2.4, 1.2 Hz, ArH), 7.59 (t, 1H, <i>J</i> = 7.9 Hz, ArH), 7.79 (dt, 1H, <i>J</i> = 7.9, 1.2 Hz, ArH), 8.03 (d, 2H, <i>J</i> = 8.8 Hz, ArH), 8.11 (d, 2H, <i>J</i> = 8.9 Hz, ArH), 10.57 (s, 1H, OH). |
| <sup>13</sup> C NMR | (125 MHz, DMSO- <i>d</i> <sub>6</sub> ) δ 114.2, 116.5, 119.1, 119.5, 121.7, 123.6, 125.2, 129.4, 130.3, 130.7, 137.0, 155.9, 159.2, 162.2, 167.1, 167.6, 175.6.                                                                                                                                                                                                                                     |
| HRMS (ESI)          | calcd for C <sub>21</sub> H <sub>15</sub> N <sub>2</sub> O <sub>5</sub> 375.0975, 375.0965 found [MH] <sup>+</sup>                                                                                                                                                                                                                                                                                   |

|                     |                                                                                                                                                                                                                                                                                                                                                                                                                                                |
|---------------------|------------------------------------------------------------------------------------------------------------------------------------------------------------------------------------------------------------------------------------------------------------------------------------------------------------------------------------------------------------------------------------------------------------------------------------------------|
| <b>82a</b>          | 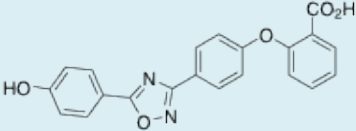                                                                                                                                                                                                                                                                                                                                                             |
| <sup>1</sup> H NMR  | (500 MHz, acetone- <i>d</i> <sub>6</sub> ) δ 7.08 (d, 2H, <i>J</i> = 9.0 Hz, ArH), 7.09 (d, 2H, <i>J</i> = 9.0 Hz, ArH), 7.22 (dd, 1H, <i>J</i> = 7.8, 1.0 Hz, ArH), 7.40 (td, 1H, <i>J</i> = 7.8, 1.0 Hz, ArH), 7.69 (td, 1H, <i>J</i> = 7.8, 1.7 Hz, ArH), 8.03 (dd, 1H, <i>J</i> = 7.8, 1.7 Hz, ArH), 8.09 (d, 2H, <i>J</i> = 9.0 Hz, ArH), 8.11 (d, 2H, <i>J</i> = 9.0 Hz, ArH).                                                           |
| <sup>13</sup> C NMR | (125 MHz, acetone- <i>d</i> <sub>6</sub> ) δ 96.9, 116.5, 117.1, 118.4, 122.3, 123.3, 125.8, 129.9, 131.0, 133.1, 135.0, 155.7, 161.8, 162.7, 166.4, 169.0, 176.6.                                                                                                                                                                                                                                                                             |
| HRMS (ESI)          | calcd for C <sub>21</sub> H <sub>13</sub> N <sub>2</sub> O <sub>5</sub> 373.0830, 373.0814 found [M-H] <sup>-</sup>                                                                                                                                                                                                                                                                                                                            |
| <b>83a</b>          |                                                                                                                                                                                                                                                                                                                                                              |
| <sup>1</sup> H NMR  | (600 MHz, DMSO- <i>d</i> <sub>6</sub> ) δ 7.00 (d, 2H, <i>J</i> = 8.8 Hz, ArH), 7.09 (dd, 1H, <i>J</i> = 7.7, 1.0 Hz, ArH), 7.15 (d, 2H, <i>J</i> = 8.8 Hz, ArH), 7.31 (td, 1H, <i>J</i> = 7.7, 1.0 Hz, ArH), 7.52 (td, 1H, <i>J</i> = 7.7, 1.8 Hz, ArH), 7.52 (br s, 1H, NH), 7.68 (br s, 1H, NH), 7.72 (dd, 2H, <i>J</i> = 7.7, 1.8 Hz, ArH), 8.03 (d, 2H, <i>J</i> = 8.8 Hz, ArH), 8.06 (d, 2H, <i>J</i> = 8.8 Hz, ArH), 10.56 (s, 1H, OH). |
| <sup>13</sup> C NMR | (125 MHz, DMSO- <i>d</i> <sub>6</sub> ) δ 114.1, 116.3, 118.3, 120.6, 121.1, 124.6, 128.8, 129.0, 130.1, 130.2, 132.0, 152.4, 159.6, 162.1, 166.7, 167.5, 175.4.                                                                                                                                                                                                                                                                               |
| HRMS (ESI)          | calcd for C <sub>21</sub> H <sub>16</sub> N <sub>3</sub> O <sub>4</sub> 374.1135, found 374.1123 [MH] <sup>+</sup>                                                                                                                                                                                                                                                                                                                             |
| <b>84a</b>          |                                                                                                                                                                                                                                                                                                                                                            |
| <sup>1</sup> H NMR  | (500 MHz, DMSO- <i>d</i> <sub>6</sub> ) δ 4.99 (br s, 2H, NH <sub>2</sub> ), 6.60 (td, 1H, <i>J</i> = 7.8, 1.5 Hz, ArH), 6.85 (dd, 1H, <i>J</i> = 7.8, 1.6 Hz, ArH), 6.91 (dd, 1H, <i>J</i> = 7.8, 1.5 Hz, ArH), 6.97–6.98 (m, 1H, ArH), 6.99 (d, 2H, <i>J</i> = 8.9 Hz, ArH), 7.05 (d, 2H, <i>J</i> = 8.9 Hz, ArH), 8.02 (d, 2H, <i>J</i> = 8.9 Hz, ArH), 8.03 (d, 2H, <i>J</i> = 8.9 Hz, ArH), 10.55 (s, 1H, OH).                            |
| <sup>13</sup> C NMR | (125 MHz, DMSO- <i>d</i> <sub>6</sub> ) δ 114.2, 116.1, 116.3, 116.5, 116.7, 120.1, 121.3, 125.9, 128.9, 130.1, 140.3, 140.9, 160.3, 162.0, 167.6, 175.3.                                                                                                                                                                                                                                                                                      |
| HRMS (ESI)          | calcd for C <sub>20</sub> H <sub>16</sub> N <sub>3</sub> O <sub>3</sub> 346.1186, found 346.1199 [MH] <sup>+</sup>                                                                                                                                                                                                                                                                                                                             |

|                     |                                                                                                                                                                                                                                                      |
|---------------------|------------------------------------------------------------------------------------------------------------------------------------------------------------------------------------------------------------------------------------------------------|
| <b>85a</b>          | 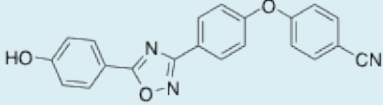                                                                                                                                                                   |
| <sup>1</sup> H NMR  | (500 MHz, CDCl <sub>3</sub> ) δ 5.41 (br s, 1H, OH), 6.98–7.00 (m, 2H, ArH), 7.09–7.11 (m, 2H, ArH), 7.17–7.19 (m, 2H, ArH), 7.65–7.67 (m, 2H, ArH), 8.12–8.14 (m, 2H, ArH), 8.20–8.22 (m, 2H, ArH).                                                 |
| <sup>13</sup> C NMR | (125 MHz, CDCl <sub>3</sub> ) δ 106.9, 116.3, 117.2, 118.8, 118.9, 120.4, 124.0, 129.8, 130.6, 134.5, 157.6, 159.8, 160.9, 168.2, 175.8.                                                                                                             |
| HRMS (ESI)          | calcd for C <sub>21</sub> H <sub>14</sub> N <sub>3</sub> O <sub>3</sub> , 356.1030, found 356.1023 [MH] <sup>+</sup>                                                                                                                                 |
| <b>85b</b>          |                                                                                                                                                                    |
| <sup>1</sup> H NMR  | (500 MHz, DMSO- <i>d</i> <sub>6</sub> ) δ 7.24 (d, 2H, <i>J</i> = 8.5 Hz, ArH), 7.33 (d, 2H, <i>J</i> = 8.5 Hz, ArH), 7.89 (d, 2H, <i>J</i> = 8.5 Hz, ArH), 8.14 (d, 2H, <i>J</i> = 8.5 Hz, ArH), 8.37 (s, 1H, ArH).                                 |
| <sup>13</sup> C NMR | (125 MHz, DMSO- <i>d</i> <sub>6</sub> ) δ 106.8, 110.8, 119.2, 119.8, 120.0, 123.0, 130.2, 130.9, 134.1, 135.4, 158.2, 160.6, 168.0, 170.2.                                                                                                          |
| HRMS (ESI)          | calcd for C <sub>18</sub> H <sub>11</sub> ClN <sub>5</sub> O <sub>2</sub> , 364.0596, found 364.0614 [MH] <sup>+</sup>                                                                                                                               |
| <b>86b</b>          |                                                                                                                                                                  |
| <sup>1</sup> H NMR  | (500 MHz, DMSO- <i>d</i> <sub>6</sub> ) δ 3.23 (s, 3H, CH <sub>3</sub> ), 7.31 (d, 2H, <i>J</i> = 8.5 Hz, ArH), 7.36 (d, 2H, <i>J</i> = 8.5 Hz, ArH), 7.97 (d, 2H, <i>J</i> = 8.5 Hz, ArH), 8.16 (d, 2H, <i>J</i> = 8.5 Hz, ArH), 8.39 (s, 1H, ArH). |
| <sup>13</sup> C NMR | (125 MHz, DMSO- <i>d</i> <sub>6</sub> ) δ 43.7, 110.1, 118.7, 120.3, 122.3, 129.5, 129.7, 130.3, 133.4, 135.7, 157.8, 160.2, 167.4, 169.5.                                                                                                           |
| HRMS (ESI)          | calcd for C <sub>18</sub> H <sub>13</sub> ClN <sub>4</sub> NaO <sub>4</sub> S, 439.0238, found 439.0245 [MNa] <sup>+</sup>                                                                                                                           |
| <b>87b</b>          |                                                                                                                                                                  |
| <sup>1</sup> H NMR  | (500MHz, DMSO- <i>d</i> <sub>6</sub> ) δ 2.57 (s, 3H, CH <sub>3</sub> ), 7.20 (d, 2H, <i>J</i> = 8.5 Hz, ArH), 7.30 (d, 2H, <i>J</i> = 8.5 Hz, ArH), 8.03 (d, 2H, <i>J</i> = 8.5 Hz, ArH), 8.14 (d, 2H, <i>J</i> = 8.0 Hz, ArH), 8.37 (s, 1H, ArH).  |
| <sup>13</sup> C NMR | (125MHz, DMSO- <i>d</i> <sub>6</sub> ) δ 27.3, 110.8, 119.0, 120.5, 122.5, 130.1, 130.9, 131.5, 133.2, 134.1, 158.9, 160.6, 168.0, 170.1, 197.2.                                                                                                     |
| HRMS (ESI)          | calcd for C <sub>19</sub> H <sub>14</sub> ClN <sub>4</sub> O <sub>3</sub> , 381.0749, found 381.0748 [MH] <sup>+</sup>                                                                                                                               |

|                     |                                                                                                                                                                                                                                                                                                                                                                                                                                   |
|---------------------|-----------------------------------------------------------------------------------------------------------------------------------------------------------------------------------------------------------------------------------------------------------------------------------------------------------------------------------------------------------------------------------------------------------------------------------|
| <b>88a</b>          | 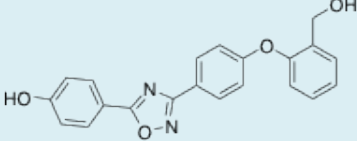                                                                                                                                                                                                                                                                                                                                                |
| <sup>1</sup> H NMR  | (500 MHz, acetone- <i>d</i> <sub>6</sub> ) δ 4.24 (t, 1H, <i>J</i> = 5.5 Hz, OH), 4.69 (d, 2H, <i>J</i> = 5.5 Hz, CH <sub>2</sub> ), 7.03 (d, 1H, <i>J</i> = 7.6 Hz, ArH), 7.07–7.09 (m, 4H, ArH), 7.28 (t, 1H, <i>J</i> = 7.6 Hz, ArH), 7.35 (t, 1H, <i>J</i> = 7.6 Hz, ArH), 7.68 (d, 1H, <i>J</i> = 7.6 Hz, ArH), 8.08–8.12 (m, 4H, ArH), 9.37 (s, 1H, OH).                                                                    |
| <sup>13</sup> C NMR | (125 MHz, acetone- <i>d</i> <sub>6</sub> ) δ 59.5, 116.5, 117.1, 118.3, 120.9, 122.4, 125.8, 129.3, 129.6, 130.0, 131.0, 135.3, 153.3, 161.4, 162.7, 169.0, 176.6.                                                                                                                                                                                                                                                                |
| HRMS (ESI)          | calcd for C <sub>21</sub> H <sub>17</sub> N <sub>2</sub> O <sub>4</sub> 361.1183, found 361.1170 [MH] <sup>+</sup>                                                                                                                                                                                                                                                                                                                |
| <b>89a</b>          |                                                                                                                                                                                                                                                                                                                                                 |
| <sup>1</sup> H NMR  | (300 MHz, CDCl <sub>3</sub> ) δ 4.52 (s, 2H, CH <sub>2</sub> ), 6.99 (d, 2H, <i>J</i> = 8.9 Hz, ArH), 7.04 (d, 2H, <i>J</i> = 8.9 Hz, ArH), 7.12 (d, 2H, <i>J</i> = 8.9 Hz, ArH), 7.41 (d, 2H, <i>J</i> = 8.9 Hz, ArH), 8.13 (d, 2H, <i>J</i> = 8.9 Hz, ArH), 8.14 (d, 2H, <i>J</i> = 8.9 Hz, ArH).                                                                                                                               |
| <sup>13</sup> C NMR | (125 MHz, acetone- <i>d</i> <sub>6</sub> ) δ 34.0, 116.4, 117.1, 119.7, 120.5, 123.3, 130.1, 131.0, 132.1, 135.2, 157.3, 160.6, 162.7, 168.9, 176.7.                                                                                                                                                                                                                                                                              |
| HRMS (ESI)          | calcd for C <sub>21</sub> H <sub>16</sub> BrN <sub>2</sub> O <sub>3</sub> 423.0339, found 423.0317 [MH] <sup>+</sup>                                                                                                                                                                                                                                                                                                              |
| <b>90a</b>          |                                                                                                                                                                                                                                                                                                                                               |
| <sup>1</sup> H NMR  | (400 MHz, DMSO- <i>d</i> <sub>6</sub> ) δ 7.01–7.03 (m, 2H, ArH), 7.41–7.45 (m, 1H, ArH), 7.78–7.91 (m, 2H, ArH), 8.04–8.07 (m, 2H, ArH), 8.23–8.27 (m, 2H, ArH), 8.88 (d, 1H <i>J</i> = 12.4 Hz, ArH), 10.59 (s, 1H, OH).                                                                                                                                                                                                        |
| <sup>13</sup> C NMR | (100 MHz, DMSO- <i>d</i> <sub>6</sub> ) δ 108.2 (d, 1C, <i>J</i> <sub>CF</sub> = 26.0 Hz), 112.8, 113.1 (d, 1C, <i>J</i> <sub>CF</sub> = 9.4 Hz), 114.2, 115.6 (d, 1C, <i>J</i> <sub>CF</sub> = 26.1 Hz), 116.4, 121.0, 121.7, 124.2 (d, 1C, <i>J</i> <sub>CF</sub> = 2.3 Hz), 124.3 (d, 1C, <i>J</i> <sub>CF</sub> = 5.1 Hz), 127.2, 130.2, 152.2, 158.0, 158.7 (d, 1C, <i>J</i> <sub>CF</sub> = 237.7 Hz), 162.1, 168.0, 175.6. |
| HRMS (ESI)          | calcd for C <sub>20</sub> H <sub>12</sub> FN <sub>2</sub> O <sub>3</sub> , 347.0826, found 347.0803 [MH] <sup>+</sup>                                                                                                                                                                                                                                                                                                             |

|                     |                                                                                                                                                                                                                                                                                                                                                                                  |
|---------------------|----------------------------------------------------------------------------------------------------------------------------------------------------------------------------------------------------------------------------------------------------------------------------------------------------------------------------------------------------------------------------------|
| <b>91a</b>          | 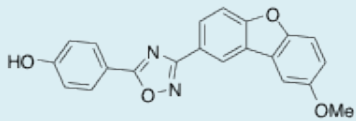                                                                                                                                                                                                                                                                                               |
| <sup>1</sup> H NMR  | (400 MHz, DMSO- <i>d</i> <sub>6</sub> ) δ 3.87 (s, 3H, CH <sub>3</sub> ), 7.01 (d, 2H, <i>J</i> = 8.8 Hz, ArH), 7.10–7.13 (m, 1H, ArH), 7.62 (d, 1H, <i>J</i> = 8.8 Hz, ArH), 7.80 (d, 1H, <i>J</i> = 8.8 Hz, ArH), 7.91 (d, 1H, <i>J</i> = 2.4 Hz, ArH), 8.04 (d, 2H, <i>J</i> = 8.8 Hz, ArH), 8.14–8.17 (m, 1H, ArH), 8.82 (d, 1H, <i>J</i> = 1.6 Hz, ArH), 10.58 (s, 1H, OH). |
| <sup>13</sup> C NMR | (100 MHz, DMSO- <i>d</i> <sub>6</sub> ) δ 55.8, 104.6, 112.3, 112.4, 114.2, 116.3, 116.4, 120.4, 121.3, 123.6, 124.7, 126.4, 130.1, 150.6, 156.0, 157.7, 162.0, 168.1, 175.5.                                                                                                                                                                                                    |
| HRMS (ESI)          | calcd for C <sub>21</sub> H <sub>15</sub> N <sub>2</sub> O <sub>4</sub> , 359.1026, found 359.1030 [MH] <sup>+</sup>                                                                                                                                                                                                                                                             |
| <b>92b</b>          |                                                                                                                                                                                                                                                                                                |
| <sup>1</sup> H NMR  | (400 MHz, DMSO- <i>d</i> <sub>6</sub> ) δ 7.56–7.59 (m, 1H, ArH), 7.88 (d, 1H, <i>J</i> = 8.8 Hz, ArH), 7.95 (d, 1H, <i>J</i> = 8.8 Hz, ArH), 8.27–8.29 (m, 1H, ArH), 8.39 (s, 1H, ArH), 8.54 (s, 1H, ArH), 9.02 (d, 1H, <i>J</i> = 1.2 Hz, ArH).                                                                                                                                |
| <sup>13</sup> C NMR | (100 MHz, DMSO- <i>d</i> <sub>6</sub> ) δ 110.2, 112.9, 113.2, 115.3, 120.3 (q, 1C, <i>J</i> <sub>CF</sub> = 256.0 Hz), 121.4, 121.5, 121.7, 124.0, 124.3, 127.6, 130.3, 133.5, 144.4, 144.4, 154.2, 158.1, 167.9.                                                                                                                                                               |
| HRMS (ESI)          | calcd for C <sub>18</sub> H <sub>9</sub> ClF <sub>3</sub> N <sub>4</sub> O <sub>3</sub> , 421.0310, found 421.0307 [MH] <sup>+</sup>                                                                                                                                                                                                                                             |
| <b>95a</b>          |                                                                                                                                                                                                                                                                                              |
| <sup>1</sup> H NMR  | (500 MHz, CD <sub>3</sub> OD) δ 6.91 (d, 2H, <i>J</i> = 8.9 Hz, ArH), 6.97 (d, 2H, <i>J</i> = 8.9 Hz, ArH), 7.95 (d, 2H, <i>J</i> = 8.9 Hz, ArH), 8.04 (d, 2H, <i>J</i> = 8.9 Hz, ArH).                                                                                                                                                                                          |
| <sup>13</sup> C NMR | (125 MHz, CD <sub>3</sub> OD) δ 116.7, 116.9, 117.2, 119.4, 130.2, 131.3, 161.8, 163.6, 170.0, 177.2.                                                                                                                                                                                                                                                                            |
| HRMS (ESI)          | calcd for C <sub>14</sub> H <sub>11</sub> N <sub>2</sub> O <sub>3</sub> , 255.0764, found 255.0756 [MH] <sup>+</sup>                                                                                                                                                                                                                                                             |

|                     |                                                                                                                                                                                                                                                                                                                                                              |
|---------------------|--------------------------------------------------------------------------------------------------------------------------------------------------------------------------------------------------------------------------------------------------------------------------------------------------------------------------------------------------------------|
| <b>96b</b>          | 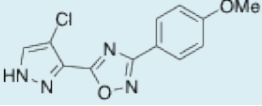                                                                                                                                                                                                                                                                           |
| <sup>1</sup> H NMR  | (400 MHz, DMSO- <i>d</i> <sub>6</sub> ) δ 3.85 (s, 3H, CH <sub>3</sub> ), 7.15 (d, 2H, <i>J</i> = 8.6 Hz, ArH), 8.02 (d, 2H, <i>J</i> = 8.6 Hz, ArH), 8.36 (s, 1H, ArH).                                                                                                                                                                                     |
| <sup>13</sup> C NMR | (125 MHz, DMSO- <i>d</i> <sub>6</sub> ) δ 56.0, 110.7, 115.3, 118.9, 129.5, 130.8, 134.2, 162.5, 168.3, 169.8.                                                                                                                                                                                                                                               |
| HRMS(ESI)           | calcd for C <sub>12</sub> H <sub>10</sub> ClN <sub>4</sub> O <sub>2</sub> 277.0487, found 277.0499 [MH] <sup>+</sup>                                                                                                                                                                                                                                         |
| <b>97a</b>          |                                                                                                                                                                                                                                                                            |
| <sup>1</sup> H NMR  | (600 MHz, CDCl <sub>3</sub> ) δ 1.41 (s, 9H, C(CH <sub>3</sub> ) <sub>3</sub> ), 5.64 (br s, 1H, OH), 6.98 (d, 2H, <i>J</i> = 8.5 Hz, ArH), 7.11 (d, 2H, <i>J</i> = 8.5 Hz, ArH), 8.06 (d, 2H, <i>J</i> = 8.5 Hz, ArH), 8.12 (d, 2H, <i>J</i> = 8.5 Hz, ArH).                                                                                                |
| <sup>13</sup> C NMR | (150 MHz, CDCl <sub>3</sub> ) δ 29.1, 79.6, 116.3, 117.4, 121.9, 124.1, 128.7, 130.6, 158.5, 159.7, 168.8, 175.6.                                                                                                                                                                                                                                            |
| HRMS (ESI)          | calcd for C <sub>18</sub> H <sub>18</sub> N <sub>2</sub> NaO <sub>3</sub> 333.1210, found 333.1202 [MNa] <sup>+</sup>                                                                                                                                                                                                                                        |
| <b>78b</b>          |                                                                                                                                                                                                                                                                           |
| <sup>1</sup> H NMR  | (500 MHz, DMSO- <i>d</i> <sub>6</sub> ) δ 7.60 (d, 2H, <i>J</i> = 8.5 Hz), 8.21 (d, 2H, <i>J</i> = 8.5 Hz), 8.37 (s, 1H).                                                                                                                                                                                                                                    |
| <sup>13</sup> C NMR | (100 MHz, DMSO- <i>d</i> <sub>6</sub> ) δ 110.7, 120.4 (q, 1C, <i>J</i> <sub>CF</sub> = 257.4 Hz), 122.1, 125.6, 129.9, 130.8, 133.8, 151.0, 167.4, 170.1.                                                                                                                                                                                                   |
| <sup>19</sup> F NMR | (376 MHz, DMSO) δ -56.75 (s, 3F).                                                                                                                                                                                                                                                                                                                            |
| HRMS (ESI)          | calcd for C <sub>12</sub> H <sub>7</sub> ClF <sub>3</sub> N <sub>4</sub> O <sub>2</sub> , 331.0204, found 331.0218 [MH] <sup>+</sup>                                                                                                                                                                                                                         |
| <b>78c</b>          |                                                                                                                                                                                                                                                                          |
| <sup>1</sup> H NMR  | (500 MHz, CDCl <sub>3</sub> ) δ 6.70 (ddd, 1H, <i>J</i> = 3.1, 2.3, 0.8 Hz, ArH), 7.31 (dd, 1H, <i>J</i> = 3.1, 2.3 Hz, ArH), 7.35 (d, 2H, <i>J</i> = 8.9 Hz, ArH), 7.51 (d, 1H, <i>J</i> = 8.6 Hz, ArH), 8.04 (dd, 1H, <i>J</i> = 8.6, 1.6 Hz, ArH), 8.24 (d, 2H, <i>J</i> = 8.9 Hz, ArH), 8.55 (dd, 1H, <i>J</i> = 1.6, 0.8 Hz, ArH), 8.61 (br s, 1H, NH). |
| <sup>13</sup> C NMR | (100 MHz, CDCl <sub>3</sub> ) δ 104.2, 111.9, 116.1, 120.6 (q, 1C, <i>J</i> <sub>CF</sub> = 258.2 Hz), 121.2, 122.1, 122.4, 126.15, 126.24, 128.2, 129.4, 138.4, 151.3, 168.0, 177.6.                                                                                                                                                                        |
| HRMS (ESI)          | calcd for C <sub>17</sub> H <sub>11</sub> F <sub>3</sub> N <sub>3</sub> O <sub>2</sub> 346.0798, found 346.0823 [MH] <sup>+</sup>                                                                                                                                                                                                                            |



|                     |                                                                                                                                                                                                                                                                                                                                                                                                                             |
|---------------------|-----------------------------------------------------------------------------------------------------------------------------------------------------------------------------------------------------------------------------------------------------------------------------------------------------------------------------------------------------------------------------------------------------------------------------|
| <b>98a</b>          | 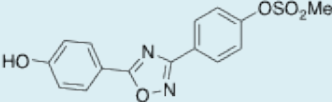                                                                                                                                                                                                                                                                                                                                          |
| <sup>1</sup> H NMR  | (500 MHz, CD <sub>3</sub> OD) δ 3.29 (s, 3H, CH <sub>3</sub> ), 4.87 (s, 1H, OH), 6.96 (d, 2H, <i>J</i> = 8.8 Hz, ArH), 7.48 (d, 2H, <i>J</i> = 8.7 Hz, ArH), 8.03 (d, 2H, <i>J</i> = 8.8 Hz, ArH), 8.18 (d, 2H, <i>J</i> = 8.7 Hz, ArH).                                                                                                                                                                                   |
| <sup>13</sup> C NMR | (125 MHz, CD <sub>3</sub> OD) δ 38.0, 116.4, 117.3, 124.1, 127.6, 130.3, 131.4, 153.1, 163.7, 169.1, 177.8.                                                                                                                                                                                                                                                                                                                 |
| HRMS (ESI)          | calcd for C <sub>15</sub> H <sub>13</sub> N <sub>2</sub> O <sub>5</sub> S 333.0540, found 333.0549 [MH] <sup>+</sup>                                                                                                                                                                                                                                                                                                        |
| <b>99a</b>          |                                                                                                                                                                                                                                                                                                                                           |
| <sup>1</sup> H NMR  | (500 MHz, CDCl <sub>3</sub> ) δ 1.60 (d, 6H, <i>J</i> = 6.8 Hz, CH(CH <sub>3</sub> ) <sub>2</sub> ), 3.55 (sept, 1H, <i>J</i> = 6.8 Hz, CH(CH <sub>3</sub> ) <sub>2</sub> ), 6.92 (d, 2H, <i>J</i> = 8.2 Hz, ArH), 7.39 (d, 2H, <i>J</i> = 8.4 Hz, ArH), 8.05 (d, 2H, <i>J</i> = 8.2 Hz, ArH), 8.16 (d, 2H, <i>J</i> = 8.4 Hz, ArH).                                                                                        |
| <sup>13</sup> C NMR | (125 MHz, CDCl <sub>3</sub> ) δ 16.8, 53.1, 116.1, 116.5, 122.4, 125.9, 129.2, 130.3, 150.8, 159.9, 167.7, 175.8.                                                                                                                                                                                                                                                                                                           |
| HRMS (ESI)          | calcd for C <sub>17</sub> H <sub>17</sub> N <sub>2</sub> O <sub>5</sub> S 361.0853, found 361.0877 [MH] <sup>+</sup>                                                                                                                                                                                                                                                                                                        |
| <b>100a</b>         |                                                                                                                                                                                                                                                                                                                                         |
| <sup>1</sup> H NMR  | (500 MHz, CDCl <sub>3</sub> ) δ 1.46 (s, 9H, C(CH <sub>3</sub> ) <sub>3</sub> ), 2.00 (pent, 2H, <i>J</i> = 6.1 Hz, CH <sub>2</sub> ), 3.36 (q, 2H, <i>J</i> = 6.1 Hz, CH <sub>2</sub> N), 4.04 (t, 2H, <i>J</i> = 6.1 Hz, CH <sub>2</sub> O), 4.84 (br s, 1H, NH), 6.93 (d, 2H, <i>J</i> = 8.8 Hz, ArH), 6.97 (d, 2H, <i>J</i> = 8.6 Hz, ArH), 8.03 (d, 2H, <i>J</i> = 8.8 Hz, ArH), 8.05 (d, 2H, <i>J</i> = 8.6 Hz, ArH). |
| <sup>13</sup> C NMR | (125 MHz, CDCl <sub>3</sub> ) δ 28.6, 29.8, 38.2, 65.9, 80.1, 114.8, 116.3, 116.8, 119.9, 129.3, 130.5, 156.7, 160.4, 161.2, 168.6, 175.6.                                                                                                                                                                                                                                                                                  |
| HRMS (ESI)          | calcd for C <sub>22</sub> H <sub>26</sub> N <sub>3</sub> O <sub>5</sub> 412.1867, found 412.1851 [MH] <sup>+</sup>                                                                                                                                                                                                                                                                                                          |
| <b>101a</b>         |                                                                                                                                                                                                                                                                                                                                         |
| <sup>1</sup> H NMR  | (500 MHz, CD <sub>3</sub> OD) δ 2.19 (s, 2H, CH <sub>2</sub> ), 3.18 (s, 2H, CH <sub>2</sub> N), 4.18 (s, 2H, CH <sub>2</sub> O), 6.95 (d, 2H, <i>J</i> = 8.4 Hz, ArH), 7.07 (d, 2H, <i>J</i> = 7.8 Hz, ArH), 7.99–8.05 (m, 4H, ArH).                                                                                                                                                                                       |
| <sup>13</sup> C NMR | (125 MHz, CD <sub>3</sub> OD) δ 28.5, 38.8, 66.6, 116.0, 116.5, 117.2, 121.1, 130.1, 131.3, 162.4, 163.5, 169.6, 177.2.                                                                                                                                                                                                                                                                                                     |
| HRMS (ESI)          | calcd for C <sub>17</sub> H <sub>18</sub> N <sub>3</sub> O <sub>3</sub> 312.1343, found 312.1350 [MH] <sup>+</sup>                                                                                                                                                                                                                                                                                                          |

|                     |                                                                                                                                                                                                                                                                                                                                                                                               |
|---------------------|-----------------------------------------------------------------------------------------------------------------------------------------------------------------------------------------------------------------------------------------------------------------------------------------------------------------------------------------------------------------------------------------------|
| <b>102a</b>         | 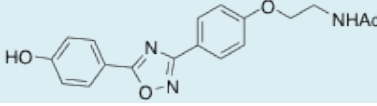                                                                                                                                                                                                                                                                                                            |
| <sup>1</sup> H NMR  | (500 MHz, DMSO- <i>d</i> <sub>6</sub> ) δ 1.83 (s, 3H, CH <sub>3</sub> ), 3.44 (q, 2H, <i>J</i> = 5.6 Hz, CH <sub>2</sub> N), 4.07 (t, 2H, <i>J</i> = 5.6 Hz, CH <sub>2</sub> O), 6.99 (d, 2H, <i>J</i> = 9.0 Hz, ArH), 7.14 (d, 2H, <i>J</i> = 9.0 Hz, ArH), 8.00 (d, 2H, <i>J</i> = 9.0 Hz, ArH), 8.02 (d, 2H, <i>J</i> = 9.0 Hz, ArH), 8.14 (br s, 1H, NH), 10.54 (s, 1H, OH).             |
| <sup>13</sup> C NMR | (125 MHz, DMSO- <i>d</i> <sub>6</sub> ) δ 22.5, 38.2, 66.6, 114.2, 115.1, 116.3, 118.8, 128.7, 130.1, 160.8, 162.0, 167.7, 169.5, 175.2.                                                                                                                                                                                                                                                      |
| HRMS (ESI)          | calcd for C <sub>18</sub> H <sub>18</sub> N <sub>3</sub> O <sub>4</sub> 340.1292, found 340.1286 [MH] <sup>+</sup>                                                                                                                                                                                                                                                                            |
| <b>103a</b>         |                                                                                                                                                                                                                                                                                                             |
| <sup>1</sup> H NMR  | (500 MHz, DMSO- <i>d</i> <sub>6</sub> ) δ 2.94 (s, 3H, CH <sub>3</sub> N), 3.07 (s, 3H, CH <sub>3</sub> N), 7.00 (d, 2H, <i>J</i> = 8.8 Hz, ArH), 7.35 (d, 2H, <i>J</i> = 8.8 Hz, ArH), 8.03 (d, 2H, <i>J</i> = 8.8 Hz, ArH), 8.08 (d, 2H, <i>J</i> = 8.8 Hz, ArH), 10.58 (s, 1H, OH).                                                                                                        |
| <sup>13</sup> C NMR | (125 MHz, DMSO- <i>d</i> <sub>6</sub> ) δ 36.2, 36.4, 114.1, 116.3, 122.7, 123.2, 128.2, 130.1, 153.5, 153.7, 162.1, 167.5, 175.5.                                                                                                                                                                                                                                                            |
| HRMS (ESI)          | calcd for C <sub>17</sub> H <sub>16</sub> N <sub>3</sub> O <sub>4</sub> 326.1135, found 326.1149 [MH] <sup>+</sup>                                                                                                                                                                                                                                                                            |
| <b>104a</b>         |                                                                                                                                                                                                                                                                                                           |
| <sup>1</sup> H NMR  | (500 MHz, DMSO- <i>d</i> <sub>6</sub> ) δ 2.83 (t, 2H, <i>J</i> = 5.0 Hz, CH <sub>2</sub> ), 2.84 (s, 3H, CH <sub>3</sub> N), 3.01 (s, 3H, CH <sub>3</sub> N), 4.28 (t, 2H, <i>J</i> = 5.0 Hz, CH <sub>2</sub> N), 6.99 (d, 2H, <i>J</i> = 8.8 Hz, ArH), 7.12 (d, 2H, <i>J</i> = 8.8 Hz, ArH), 8.00 (d, 2H, <i>J</i> = 8.8 Hz, ArH), 8.02 (d, 2H, <i>J</i> = 8.8 Hz, ArH), 10.55 (s, 1H, OH). |
| <sup>13</sup> C NMR | (100 MHz, DMSO- <i>d</i> <sub>6</sub> ) δ 32.1, 34.8, 36.7, 64.3, 114.2, 115.0, 116.3, 118.6, 128.8, 130.1, 160.9, 162.0, 167.7, 169.4, 175.2.                                                                                                                                                                                                                                                |
| HRMS (ESI)          | calcd for C <sub>19</sub> H <sub>20</sub> N <sub>3</sub> O <sub>4</sub> 354.1448, found 354.1450 [MH] <sup>+</sup>                                                                                                                                                                                                                                                                            |
| <b>105a</b>         |                                                                                                                                                                                                                                                                                                           |
| <sup>1</sup> H NMR  | (400 MHz, DMSO- <i>d</i> <sub>6</sub> ) δ 6.99 (d, 2H, <i>J</i> = 8.1 Hz, ArH), 7.00–7.05 (m, 5H, ArH), 7.17 (d, 1H, <i>J</i> = 9.1 Hz, ArH), 7.54 (s, 1H, ArH), 7.67 (d, 1H, <i>J</i> = 8.7 Hz, ArH), 8.01 (d, 2H, <i>J</i> = 8.1 Hz, ArH), 10.58 (s, 1H, OH).                                                                                                                               |
| <sup>13</sup> C NMR | (150 MHz, DMSO- <i>d</i> <sub>6</sub> ) δ 114.0, 114.7, 116.3, 117.23, 117.24, 117.3, 122.5, 123.5, 124.7, 124.8, 130.1, 140.9 (2C), 141.8, 143.8, 162.1, 166.9, 175.5.                                                                                                                                                                                                                       |
| HRMS (ESI)          | calcd for C <sub>20</sub> H <sub>12</sub> N <sub>2</sub> NaO <sub>4</sub> 367.0689, found 367.0661 [MH] <sup>+</sup>                                                                                                                                                                                                                                                                          |

|                          |                                                                                                                                                                                                                                                                                                                                                                                                                 |
|--------------------------|-----------------------------------------------------------------------------------------------------------------------------------------------------------------------------------------------------------------------------------------------------------------------------------------------------------------------------------------------------------------------------------------------------------------|
| <b>106b</b>              | 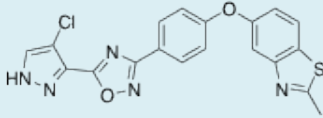                                                                                                                                                                                                                                                                                                                              |
| <sup>1</sup> H NMR       | (500 MHz, DMSO- <i>d</i> <sub>6</sub> ) δ 2.81 (s, 3H, CH <sub>3</sub> ), 7.20–7.25 (m, 3H, ArH), 7.66 (d, 1H, <i>J</i> = 2.5 Hz, ArH), 8.08–8.12 (m, 3H, ArH), 8.37 (s, 1H, ArH).                                                                                                                                                                                                                              |
| <sup>13</sup> C NMR      | (100 MHz, DMSO- <i>d</i> <sub>6</sub> ) δ 20.5, 113.4, 118.3, 118.9, 121.4, 123.9, 129.9, 130.9, 131.9, 154.7, 154.9, 160.8, 168.2, 169.9.                                                                                                                                                                                                                                                                      |
| HRMS (ESI)               | calcd for C <sub>19</sub> H <sub>13</sub> ClN <sub>5</sub> O <sub>2</sub> S, 410.0473, found 410.0497 [MH] <sup>+</sup>                                                                                                                                                                                                                                                                                         |
| <b>107a</b>              |                                                                                                                                                                                                                                                                                                                               |
| <sup>1</sup> H NMR       | (500 MHz, DMSO- <i>d</i> <sub>6</sub> ) δ 7.00 (d, 2H, <i>J</i> = 8.2 Hz, ArH), 7.15 (d, 1H, <i>J</i> = 6.7 Hz, ArH), 7.20 (t, 1H, <i>J</i> = 6.7 Hz, ArH), 7.33 (d, 2H, <i>J</i> = 8.2 Hz, ArH), 7.92 (t, 1H, <i>J</i> = 6.7 Hz, ArH), 8.04 (d, 2H, <i>J</i> = 8.2 Hz, ArH), 8.11 (d, 2H, <i>J</i> = 8.2 Hz, ArH), 8.21 (d, 1H, <i>J</i> = 6.7 Hz, ArH), 10.58 (s, 1H, OH).                                    |
| <sup>13</sup> C NMR      | (125 MHz, DMSO- <i>d</i> <sub>6</sub> ) δ 112.2, 114.1, 116.3, 119.7, 121.5, 122.4, 128.7, 130.2, 140.5, 147.6, 156.6, 162.1, 162.4, 167.6, 175.5.                                                                                                                                                                                                                                                              |
| HRMS (ESI)               | calcd for C <sub>19</sub> H <sub>14</sub> N <sub>3</sub> O <sub>3</sub> , 332.1030, found 332.1031 [MH] <sup>+</sup>                                                                                                                                                                                                                                                                                            |
| <b>108a</b>              |                                                                                                                                                                                                                                                                                                                             |
| <sup>1</sup> H NMR       | (500 MHz, DMSO- <i>d</i> <sub>6</sub> ) δ 1.90 (br s, 2H, CH <sub>2</sub> ), 2.15 (br s, 2H, CH <sub>2</sub> ), 3.09 (br s, 2H, CH <sub>2</sub> N), 3.23 (br s, 2H, CH <sub>2</sub> N), 4.79 (br s, 1H, CHOAr), 7.02 (d, 2H, <i>J</i> = 8.2 Hz, ArH), 7.19 (d, 2H, <i>J</i> = 8.2 Hz, ArH), 7.99 (d, 2H, <i>J</i> = 8.2 Hz, ArH), 8.00 (d, 2H, <i>J</i> = 8.2 Hz, ArH), 9.20 (br s, 1H, NH), 10.69 (s, 1H, OH). |
| <sup>13</sup> C NMR      | (125 MHz, DMSO- <i>d</i> <sub>6</sub> ) δ 27.0, 40.4, 69.2, 114.1, 116.2, 116.3, 119.0, 128.8, 130.0, 159.1, 162.1, 167.6, 175.3.                                                                                                                                                                                                                                                                               |
| HRMS (FAB <sup>+</sup> ) | calcd for C <sub>19</sub> H <sub>20</sub> N <sub>3</sub> O <sub>3</sub> , 338.1505, found 338.1498 [MH] <sup>+</sup>                                                                                                                                                                                                                                                                                            |

|                     |                                                                                                                                                                                                                                                                                                              |
|---------------------|--------------------------------------------------------------------------------------------------------------------------------------------------------------------------------------------------------------------------------------------------------------------------------------------------------------|
| <b>108b</b>         | 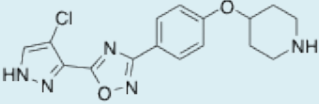                                                                                                                                                                                                                           |
| <sup>1</sup> H NMR  | (500 MHz, CD <sub>3</sub> OD) δ 1.99–2.04 (m, 2H, CH <sub>2</sub> ), 2.12–2.17 (m, 2H, CH <sub>2</sub> ), 3.16–3.24 (m, 3H, NCH <sub>2</sub> + ArOCH), 3.34–3.39 (m, 2H, NCH <sub>2</sub> ), 7.10 (d, 2H, <i>J</i> = 8.8 Hz, ArH), 7.94 (s, 1H, ArH), 8.05 (d, 2H, <i>J</i> = 8.8 Hz, ArH).                  |
| <sup>13</sup> C NMR | (100 MHz, CD <sub>3</sub> OD) 27.2, 40.7, 68.6, 111.7, 115.6, 116.1, 118.6, 119.9, 129.2, 129.3, 159.6, 168.3                                                                                                                                                                                                |
| HRMS (ESI)          | calcd for C <sub>16</sub> H <sub>17</sub> ClN <sub>5</sub> O <sub>2</sub> , 346.1065, found 346.1088 [MH] <sup>+</sup>                                                                                                                                                                                       |
| <b>109b</b>         |                                                                                                                                                                                                                            |
| <sup>1</sup> H NMR  | (500 MHz, CDCl <sub>3</sub> ) δ 1.78–1.82 (m, 2H, CH <sub>2</sub> ), 1.95–1.99 (m, 2H, CH <sub>2</sub> ), 3.37–3.42 (m, 2H, NCH <sub>2</sub> ), 3.69–3.74 (m, 2H, NCH <sub>2</sub> ), 4.59 (br s, 1H, ArOCH), 7.03 (d, 2H, <i>J</i> = 8.5 Hz, ArH), 7.95 (s, 1H, ArH), 8.11 (d, 2H, <i>J</i> = 8.5 Hz, ArH). |
| <sup>13</sup> C NMR | (100 MHz, CDCl <sub>3</sub> ) δ 28.6, 30.6, 40.8, 72.5, 79.9, 112.9, 116.3, 119.2, 129.6, 129.7, 131.9, 155.1, 160.1, 168.6.                                                                                                                                                                                 |
| HRMS (ESI)          | calcd for C <sub>21</sub> H <sub>24</sub> ClN <sub>5</sub> NaO <sub>4</sub> 468.1409, found 468.1400 [MNa] <sup>+</sup>                                                                                                                                                                                      |
| <b>110a</b>         |                                                                                                                                                                                                                          |
| <sup>1</sup> H NMR  | (500 MHz, CDCl <sub>3</sub> ) δ 1.84 (m, 4H, 2 × CH <sub>2</sub> ), 2.13 (s, 3H, CH <sub>3</sub> ), 3.65 (br s, 2H, CH <sub>2</sub> N), 4.21 (br s, 2H, CH <sub>2</sub> N), 4.62 (br s, 1H, ArOCH), 6.89 (d, 2H, <i>J</i> = 8.6 Hz, ArH), 6.94 (d, 2H, <i>J</i> = 8.0 Hz, ArH), 7.96–7.99 (m, 4H, ArH).      |
| <sup>13</sup> C NMR | (150 MHz, acetone- <i>d</i> <sub>6</sub> ) δ 21.5, 32.0, 43.9, 73.3, 116.6, 117.07, 117.14, 120.6, 129.9, 131.0, 160.9, 162.6, 162.7, 169.2, 176.5.                                                                                                                                                          |
| HRMS (ESI)          | calcd for C <sub>21</sub> H <sub>22</sub> N <sub>3</sub> O <sub>4</sub> 380.1605, found 380.1599 [MH] <sup>+</sup>                                                                                                                                                                                           |
| <b>111a</b>         |                                                                                                                                                                                                                          |
| <sup>1</sup> H NMR  | (500 MHz, CD <sub>3</sub> OD) δ 1.55–1.67 (m, 4H, 2 × CH <sub>2</sub> ), 2.14 (m, 2H, CH <sub>2</sub> ), 2.27 (m, 2H, CH <sub>2</sub> ), 3.21 (br s, 1H, CHN), 4.44 (br s, 1H, CHOAr), 6.96 (d, 2H, <i>J</i> = 8.6 Hz, ArH), 7.07 (d, 2H, <i>J</i> = 8.4 Hz, ArH), 8.01–8.04 (m, 4H, ArH).                   |
| <sup>13</sup> C NMR | (125 MHz, CD <sub>3</sub> OD) δ 29.6, 30.7, 50.6, 75.2, 116.5, 117.1, 117.2, 120.8, 130.2, 131.3, 161.5, 163.6, 169.7, 177.3.                                                                                                                                                                                |
| HRMS (ESI)          | calcd for C <sub>20</sub> H <sub>22</sub> N <sub>3</sub> O <sub>3</sub> 352.1656, found 352.1655 [MH] <sup>+</sup>                                                                                                                                                                                           |

|                     |                                                                                                                                                                                                                                                                                                                                                                  |
|---------------------|------------------------------------------------------------------------------------------------------------------------------------------------------------------------------------------------------------------------------------------------------------------------------------------------------------------------------------------------------------------|
| <b>112a</b>         | 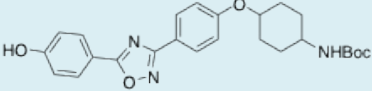                                                                                                                                                                                                                                                                               |
| <sup>1</sup> H NMR  | (500 MHz, CDCl <sub>3</sub> ) δ 1.20–1.29 (m, 2H, CH <sub>2</sub> ), 1.39 (s, 9H, C(CH <sub>3</sub> ) <sub>3</sub> ), 1.50–1.57 (m, 2H, CH <sub>2</sub> ), 1.99–2.05 (m, 2H, CH <sub>2</sub> ), 2.09–2.12 (m, 2H, CH <sub>2</sub> ), 3.46 (br s, 1H, CHN), 4.20–4.25 (m, 1H, ArOCH), 6.86–6.95 (m, 4H, ArH), 7.97–8.00 (m, 4H, ArH).                             |
| <sup>13</sup> C NMR | (125 MHz, CDCl <sub>3</sub> ) δ 25.6, 30.1, 30.7, 48.8, 75.0, 79.6, 115.6, 116.0, 116.1, 119.4, 129.2, 130.3, 132.8, 160.1, 161.5, 168.4, 175.8.                                                                                                                                                                                                                 |
| HRMS (ESI)          | calcd for C <sub>25</sub> H <sub>30</sub> N <sub>3</sub> O <sub>5</sub> 452.2180, found 452.2202 [MH] <sup>+</sup>                                                                                                                                                                                                                                               |
| <b>113a</b>         |                                                                                                                                                                                                                                                                                |
| <sup>1</sup> H NMR  | (500 MHz, DMSO- <i>d</i> <sub>6</sub> ) δ 2.38 (dt, 2H, <i>J</i> = 7.8, 3.3 Hz, CH <sub>2</sub> ), 3.49–3.52 (m, 2H, CH <sub>2</sub> N), 3.58–3.60 (m, 2H, CH <sub>2</sub> N), 5.31–5.33 (m, 1H, ArOCH), 6.97 (d, 2H, <i>J</i> = 8.9 Hz, ArH), 7.15 (d, 2H, <i>J</i> = 8.9 Hz, ArH), 8.05 (d, 2H, <i>J</i> = 8.9 Hz, ArH), 8.10 (d, 2H, <i>J</i> = 8.9 Hz, ArH). |
| <sup>13</sup> C NMR | (125 MHz, CD <sub>3</sub> OD) δ 31.8, 45.4, 52.2, 77.1, 116.5, 117.2, 117.3, 122.0, 130.4, 131.4, 160.3, 163.7, 169.6, 177.5.                                                                                                                                                                                                                                    |
| HRMS (ESI)          | calcd for C <sub>18</sub> H <sub>18</sub> N <sub>3</sub> O <sub>3</sub> 324.1343, found 324.1343 [MH] <sup>+</sup>                                                                                                                                                                                                                                               |
| <b>114b</b>         |                                                                                                                                                                                                                                                                              |
| <sup>1</sup> H NMR  | (400 MHz, CDCl <sub>3</sub> ) δ 1.48 (s, 9H, C(CH <sub>3</sub> ) <sub>3</sub> ), 2.13–2.21 (m, 2H, CH <sub>2</sub> ), 3.49–3.70 (m, 4H, 2 × CH <sub>2</sub> ), 4.95 (br s, 1H, ArOCH), 6.93 (d, 2H, <i>J</i> = 8.8 Hz, ArH), 7.91 (s, 1H, ArH), 8.02 (d, 2H, <i>J</i> = 8.8 Hz, ArH).                                                                            |
| <sup>13</sup> C NMR | (125 MHz, CDCl <sub>3</sub> ) δ 28.7, 31.2, 44.2, 51.8, 76.3, 80.0, 112.5, 115.9, 119.4, 129.6, 131.1, 134.2, 154.9, 159.9, 168.5, 168.9.                                                                                                                                                                                                                        |
| HRMS (ESI)          | calcd for C <sub>20</sub> H <sub>22</sub> ClN <sub>5</sub> NaO <sub>4</sub> , 454.1253, found 454.1266 [MNa] <sup>+</sup>                                                                                                                                                                                                                                        |
| <b>115a</b>         |                                                                                                                                                                                                                                                                              |
| <sup>1</sup> H NMR  | (400 MHz, CD <sub>3</sub> OD) δ 2.10–2.16 (m, 1H, OCH <sub>a</sub> H <sub>b</sub> C*), 2.25–2.34 (m, 1H, OCH <sub>a</sub> H <sub>b</sub> C*), 3.86–4.02 (m, 4H, 2 × CH <sub>2</sub> ), 5.09–5.12 (m, 1H, ArOCH), 6.96 (d, 2H, <i>J</i> = 8.4 Hz), 7.04 (d, 2H, <i>J</i> = 8.8 Hz), 8.04 (m, 4H).                                                                 |
| <sup>13</sup> C NMR | (100 MHz, CD <sub>3</sub> OD) δ 32.6, 66.9, 72.7, 77.7, 115.2, 115.5, 115.9, 119.7, 128.9, 130.0, 160.1, 162.2, 168.3, 176.0.                                                                                                                                                                                                                                    |
| HRMS (ESI)          | calcd for C <sub>18</sub> H <sub>17</sub> N <sub>2</sub> O <sub>4</sub> , 325.1183, found 325.1205 [MH] <sup>+</sup>                                                                                                                                                                                                                                             |

|                     |                                                                                                                                                                                                                                                                                                                                                                                                                                                                                                                                   |
|---------------------|-----------------------------------------------------------------------------------------------------------------------------------------------------------------------------------------------------------------------------------------------------------------------------------------------------------------------------------------------------------------------------------------------------------------------------------------------------------------------------------------------------------------------------------|
| <b>116b</b>         | 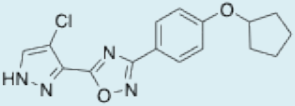                                                                                                                                                                                                                                                                                                                                                                                                                                                |
| <sup>1</sup> H NMR  | (500 MHz, DMSO- <i>d</i> <sub>6</sub> ) δ 1.60 (br s, 2H), 1.72–1.74 (m, 4H, 2 × CH <sub>2</sub> ), 1.95–1.98 (m, 2H, CH <sub>2</sub> ), 4.91 (br s, 1H, ArOCH), 7.09 (d, 2H, <i>J</i> = 8.8 Hz, ArH), 7.99 (d, 2H, <i>J</i> = 8.8 Hz, ArH), 8.36 (s, 1H, ArH).                                                                                                                                                                                                                                                                   |
| <sup>13</sup> C NMR | (100 MHz, DMSO- <i>d</i> <sub>6</sub> ) δ 24.3, 32.9, 79.8, 110.7, 116.6, 118.5, 122.4, 129.5, 130.8, 134.2, 161.0, 168.4.                                                                                                                                                                                                                                                                                                                                                                                                        |
| HRMS (ESI)          | calcd for C <sub>16</sub> H <sub>16</sub> ClN <sub>4</sub> O <sub>2</sub> , 331.0956, found 331.0967 [MH] <sup>+</sup>                                                                                                                                                                                                                                                                                                                                                                                                            |
| <b>117a</b>         |                                                                                                                                                                                                                                                                                                                                                                                                                                                 |
| <sup>1</sup> H NMR  | (600 MHz, DMSO- <i>d</i> <sub>6</sub> ) δ 1.66–1.70 (m, 1H, CH), 1.86–1.94 (m, 3H, CH + CH <sub>2</sub> ), 3.07–3.11 (m, 2H, CH <sub>2</sub> N), 3.28 (dd, 1H, <i>J</i> = 13.0, 4.6 Hz, CH <sub>a</sub> H <sub>b</sub> N), 3.35 (dd, 1H, <i>J</i> = 13.0, 2.4 Hz, CH <sub>a</sub> H <sub>b</sub> N), 4.83–4.85 (m, 1H, CHOAr), 7.00 (d, 2H, <i>J</i> = 8.9 Hz, ArH), 7.22 (d, 2H, <i>J</i> = 8.9 Hz, ArH), 8.02 (d, 2H, <i>J</i> = 8.9 Hz, ArH), 8.04 (d, 2H, <i>J</i> = 8.9 Hz, ArH), 8.57 (br s, 1H, NH), 10.56 (br s, 1H, OH). |
| <sup>13</sup> C NMR | (150 MHz, DMSO- <i>d</i> <sub>6</sub> ) δ 18.2, 25.9, 43.0, 45.6, 68.5, 114.2, 116.3, 116.5, 119.4, 128.9, 130.1, 158.8, 162.0, 167.6, 175.3.                                                                                                                                                                                                                                                                                                                                                                                     |
| HRMS (ESI)          | calcd for C <sub>19</sub> H <sub>20</sub> N <sub>3</sub> O <sub>3</sub> 338.1499, found 338.1510 [MH] <sup>+</sup>                                                                                                                                                                                                                                                                                                                                                                                                                |
| <b>117b</b>         |                                                                                                                                                                                                                                                                                                                                                                                                                                               |
| <sup>1</sup> H NMR  | (600 MHz, DMSO- <i>d</i> <sub>6</sub> ) δ 1.70–1.73 (m, 1H, CH), 1.86–1.96 (m, 3H, CH + CH <sub>2</sub> ), 3.05–3.10 (m, 2H, CH <sub>2</sub> N), 3.22–3.24 (m, 1H, CH <sub>a</sub> H <sub>b</sub> N), 3.33–3.37 (m, 1H, CH <sub>a</sub> H <sub>b</sub> ), 4.88 (pent, 1H, <i>J</i> = 2.8 Hz, CHOR), 7.25 (d, 2H, <i>J</i> = 9.0 Hz, ArH), 8.05 (d, 2H, <i>J</i> = 9.0 Hz, ArH), 8.37 (s, 1H, ArH), 8.60 (br s, 1H, NH <sub>a</sub> H <sub>b</sub> ), 9.24 (br s, 1H, NH <sub>a</sub> H <sub>b</sub> ).                            |
| <sup>13</sup> C NMR | (150 MHz, DMSO- <i>d</i> <sub>6</sub> ) δ 18.3, 26.1, 42.7, 45.3, 68.5, 110.1, 116.5, 118.9, 129.0, 130.2, 133.4, 158.9, 167.5, 169.2.                                                                                                                                                                                                                                                                                                                                                                                            |
| HRMS (ESI)          | calcd for C <sub>16</sub> H <sub>17</sub> ClN <sub>5</sub> O <sub>2</sub> 346.1065, found 346.1069 [MH] <sup>+</sup>                                                                                                                                                                                                                                                                                                                                                                                                              |

|                     |                                                                                                                                                                                                                                                                                                                                                                                                                                              |
|---------------------|----------------------------------------------------------------------------------------------------------------------------------------------------------------------------------------------------------------------------------------------------------------------------------------------------------------------------------------------------------------------------------------------------------------------------------------------|
| <b>118a</b>         | 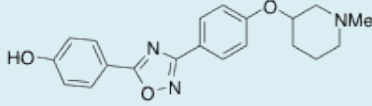                                                                                                                                                                                                                                                                                                                                                           |
| <sup>1</sup> H NMR  | (400 MHz, CDCl <sub>3</sub> ) δ 1.64–1.77 (m, 2H, CH <sub>2</sub> ), 1.95–2.05 (m, 2H, CH <sub>2</sub> ), 2.35–2.41 (m, 1H, CHN), 2.38 (s, 3H, CH <sub>3</sub> N), 2.43–2.59 (m, 1H, CHN), 2.67–2.71 (m, 1H, CHN), 2.96–3.03 (m, 1H, CHN), 4.52 (pent, 1H, <i>J</i> = 3.9 Hz, CHOR), 6.83 (d, 2H, <i>J</i> = 9.0 Hz, ArH), 6.91 (d, 2H, <i>J</i> = 9.0 Hz, ArH), 8.00 (d, 2H, <i>J</i> = 9.0 Hz, ArH), 8.03 (d, 2H, <i>J</i> = 9.0 Hz, ArH). |
| <sup>13</sup> C NMR | (100 MHz, CDCl <sub>3</sub> ) δ 22.4, 29.4, 35.8, 46.2, 55.5, 72.0, 116.0, 116.5, 120.2, 129.3, 130.5, 159.8, 161.2, 162.4, 168.5, 175.7.                                                                                                                                                                                                                                                                                                    |
| HRMS (ESI)          | calcd for C <sub>20</sub> H <sub>22</sub> N <sub>3</sub> O <sub>3</sub> 352.1656, found 352.1677 [MH] <sup>+</sup>                                                                                                                                                                                                                                                                                                                           |
| <b>118b</b>         |                                                                                                                                                                                                                                                                                                                                                            |
| <sup>1</sup> H NMR  | (400 MHz, CDCl <sub>3</sub> ) δ 1.60–1.72 (m, 2H, CH <sub>2</sub> ), 1.93–2.04 (m, 2H, CH <sub>2</sub> ), 2.34–2.40 (m, 1H, CHN), 2.39 (s, 3H, CH <sub>3</sub> N), 2.43–2.51 (m, 1H, CHN), 2.66–2.69 (m, 1H, CHN), 2.95–3.04 (m, 1H, CHN), 4.59 (pent, 1H, <i>J</i> = 3.9 Hz, CHOR), 7.04 (d, 2H, <i>J</i> = 9.1 Hz, ArH), 7.83 (s, 1H, ArH), 8.07 (d, 2H, <i>J</i> = 9.1 Hz, ArH).                                                          |
| <sup>13</sup> C NMR | (125 MHz, CDCl <sub>3</sub> ) δ 22.6, 29.1, 46.3, 55.5, 59.3, 72.3, 112.8, 114.2, 116.1, 119.2, 129.6, 132.7, 160.3, 168.6, 168.7.                                                                                                                                                                                                                                                                                                           |
| HRMS (ESI)          | calcd for C <sub>17</sub> H <sub>19</sub> ClN <sub>5</sub> O <sub>2</sub> 360.1222, found 360.1199 [MH] <sup>+</sup>                                                                                                                                                                                                                                                                                                                         |
| <b>119a</b>         |                                                                                                                                                                                                                                                                                                                                                          |
| <sup>1</sup> H NMR  | (400 MHz, DMSO- <i>d</i> <sub>6</sub> ) δ 4.06 (dd, 2H, <i>J</i> = 12.2, 4.8 Hz, CH <sub>a</sub> H <sub>b</sub> N), 4.50 (dd, 2H, <i>J</i> = 12.2, 6.6 Hz, CH <sub>a</sub> H <sub>b</sub> N), 5.19 (tt, 1H, <i>J</i> = 6.6, 4.8 Hz, CHOR), 7.00 (d, 2H, <i>J</i> = 9.1 Hz, ArH), 7.07 (d, 2H, <i>J</i> = 9.1 Hz, ArH), 8.02 (d, 2H, <i>J</i> = 9.1 Hz, ArH), 8.03 (d, 2H, <i>J</i> = 9.1 Hz, ArH), 9.05 (br s, 1H, NH), 10.61 (s, 1H, OH).   |
| <sup>13</sup> C NMR | (100 MHz, DMSO- <i>d</i> <sub>6</sub> ) δ 52.4, 67.6, 114.1, 115.5, 116.3, 120.0, 129.0, 130.0, 158.1, 162.0, 167.5, 175.4.                                                                                                                                                                                                                                                                                                                  |
| HRMS (ESI)          | calcd for C <sub>17</sub> H <sub>16</sub> N <sub>3</sub> O <sub>3</sub> 310.1186, found 310.1196 [MH] <sup>+</sup>                                                                                                                                                                                                                                                                                                                           |

|                     |                                                                                                                                                                                                                                                                                                                                                                                                                                                                                 |
|---------------------|---------------------------------------------------------------------------------------------------------------------------------------------------------------------------------------------------------------------------------------------------------------------------------------------------------------------------------------------------------------------------------------------------------------------------------------------------------------------------------|
| <b>120a</b>         | 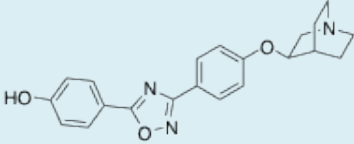                                                                                                                                                                                                                                                                                                                                                                                              |
| <sup>1</sup> H NMR  | (600 MHz, DMSO- <i>d</i> <sub>6</sub> ) δ 1.73–1.78 (m, 1H, CH), 1.86–1.91 (m, 1H, CH), 1.93–1.98 (m, 1H, CH), 2.04–2.1 (m, 1H, CH), 2.41–2.44 (m, 1H, CH), 3.15–3.20 (m, 1H, CHN), 3.22–3.33 (m, 4H, 2 × CH <sub>2</sub> N), 3.81 (dd, 1H, <i>J</i> = 13.6, 8.1 Hz, CHN), 4.93–4.96 (m, 1H, CHOAr), 7.00 (d, 2H, <i>J</i> = 8.8 Hz, ArH), 7.18 (d, 2H, <i>J</i> = 8.8 Hz, ArH), 8.02 (d, 2H, <i>J</i> = 8.8 Hz, ArH), 8.03 (d, 2H, <i>J</i> = 8.8 Hz, ArH), 10.56 (s, 1H, OH). |
| <sup>13</sup> C NMR | (150 MHz, DMSO- <i>d</i> <sub>6</sub> ) δ 16.4, 20.0, 23.7, 45.2, 45.8, 52.5, 69.9, 114.2, 116.1, 116.3, 119.4, 128.9, 130.1, 158.9, 162.0, 167.6, 175.3.                                                                                                                                                                                                                                                                                                                       |
| HRMS (ESI)          | calcd for C <sub>21</sub> H <sub>22</sub> N <sub>3</sub> O <sub>3</sub> 364.1656, found 364.1637 [MH] <sup>+</sup>                                                                                                                                                                                                                                                                                                                                                              |
| <b>120b</b>         |                                                                                                                                                                                                                                                                                                                                                                                               |
| <sup>1</sup> H NMR  | (600 MHz, DMSO- <i>d</i> <sub>6</sub> ) δ 1.57–1.64 (m, 1H, CH), 1.74–1.80 (m, 1H, CH), 1.82–1.88 (m, 1H, CH), 1.95–2.01 (m, 1H, CH), 2.28–2.32 (m, 1H, CH), 2.94–3.13 (m, 5H, CHN), 3.58–3.63 (m, 1H, CHN), 4.79–4.82 (m, 1H, CHOAr), 7.17 (d, 2H, <i>J</i> = 8.8 Hz, ArH), 8.03 (d, 2H, <i>J</i> = 8.8 Hz, ArH), 8.35 (s, 1H, ArH).                                                                                                                                           |
| <sup>13</sup> C NMR | (150 MHz, DMSO- <i>d</i> <sub>6</sub> ) δ 16.9, 20.7, 24.0, 45.1, 45.7, 52.7, 70.5, 110.2, 116.2, 118.8, 129.0, 130.8, 139.3, 159.2, 167.6, 169.1.                                                                                                                                                                                                                                                                                                                              |
| HRMS (ESI)          | calcd for C <sub>18</sub> H <sub>19</sub> ClN <sub>5</sub> O <sub>2</sub> 372.1222, found 372.1230 [MH] <sup>+</sup>                                                                                                                                                                                                                                                                                                                                                            |
| <b>121a</b>         |                                                                                                                                                                                                                                                                                                                                                                                             |
| <sup>1</sup> H NMR  | (600 MHz, DMSO- <i>d</i> <sub>6</sub> ) δ 2.16–2.18 (m, 2H, CH <sub>2</sub> ), 2.22–2.26 (m, 4H, 2 × CH <sub>2</sub> ), 2.38–2.40 (m, 2H, CH <sub>2</sub> ), 3.88–3.91 (m, 2H, 2 × CHN), 4.82–4.85 (m, 1H, CHOAr), 7.00 (d, 2H, <i>J</i> = 9.0 Hz, ArH), 7.17 (d, 2H, <i>J</i> = 9.0 Hz, ArH), 8.016 (d, 2H, <i>J</i> = 9.0 Hz, ArH), 8.02 (d, 2H, <i>J</i> = 9.0 Hz, ArH), 10.56 (s, 1H, OH).                                                                                  |
| <sup>13</sup> C NMR | (150 MHz, DMSO- <i>d</i> <sub>6</sub> ) δ 23.8, 33.5, 53.6, 61.5, 67.0, 114.2, 116.1, 116.3, 119.1, 129.0, 130.1, 158.8, 162.0, 167.7, 175.3.                                                                                                                                                                                                                                                                                                                                   |
| HRMS (ESI)          | calcd for C <sub>22</sub> H <sub>24</sub> N <sub>3</sub> O <sub>3</sub> 378.1812, found 378.1824 [MH] <sup>+</sup>                                                                                                                                                                                                                                                                                                                                                              |



|                     |                                                                                                                                                                                                                                                                                                                                                |
|---------------------|------------------------------------------------------------------------------------------------------------------------------------------------------------------------------------------------------------------------------------------------------------------------------------------------------------------------------------------------|
| <b>121b</b>         | 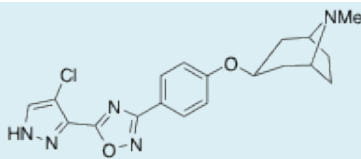                                                                                                                                                                                                                                                             |
| <sup>1</sup> H NMR  | (600 MHz, CD <sub>3</sub> OD) δ 2.19–2.22 (m, 2H, CH <sub>2</sub> ), 2.23–2.26 (m, 2H, CH <sub>2</sub> ), 2.36–2.42 (m, 4H, 2 × CH <sub>2</sub> ), 2.66 (s, 3H, CH <sub>3</sub> ), 3.64–3.69 (m, 2H, 2 × CHN), 4.77–4.80 (m, 1H, CHOR), 7.08 (d, 2H, <i>J</i> = 8.8 Hz, ArH), 7.47 (br s, 1H, NH), 8.00 (s, 1H, ArH), 8.80 (d, 2H, 8.12, ArH). |
| <sup>13</sup> C NMR | (150 MHz, DMSO- <i>d</i> <sub>6</sub> ) δ 25.0, 33.9, 59.8, 62.1, 68.6, 110.1, 116.1, 118.2, 129.0, 130.9, 132.9, 159.5, 167.6, 169.1.                                                                                                                                                                                                         |
| HRMS (ESI)          | calcd for C <sub>19</sub> H <sub>21</sub> ClN <sub>5</sub> O <sub>2</sub> 386.1378, found 386.1397 [MH] <sup>+</sup>                                                                                                                                                                                                                           |

**Table S2. Minimal-Inhibitory Concentrations (MICs)**

| Compound   | <i>E. faecium</i><br>NCTC 7171<br>MIC (μg/mL) | <i>S. aureus</i><br>ATCC 29213<br>MIC (μg/mL) |
|------------|-----------------------------------------------|-----------------------------------------------|
| <b>59b</b> | 8                                             | 0.5                                           |
| <b>60b</b> | 128                                           | 1                                             |
| <b>61b</b> | 128                                           | 1                                             |
| <b>62a</b> | 1                                             | 2                                             |
| <b>63a</b> | 1                                             | 2                                             |
| <b>64a</b> | 0.5                                           | 2                                             |
| <b>65a</b> | 1                                             | 2                                             |
| <b>66a</b> | 1                                             | 2                                             |
| <b>67a</b> | 2                                             | 2                                             |
| <b>68a</b> | 1                                             | 2                                             |
| <b>69b</b> | 128                                           | 2                                             |
| <b>70a</b> | 2                                             | 4                                             |
| <b>71a</b> | 2                                             | 4                                             |
| <b>72c</b> | 1                                             | 1–2                                           |
| <b>73a</b> | 1                                             | 4                                             |
| <b>74a</b> | 2                                             | 4                                             |
| <b>75a</b> | 0.5                                           | 4                                             |
| <b>76a</b> | 16                                            | 4                                             |
| <b>77a</b> | 4                                             | 4                                             |
| <b>93a</b> | >128                                          | >128                                          |
| <b>94a</b> | >128                                          | >128                                          |

| Compound    | <i>E. faecium</i><br>NCTC 7171<br>MIC (µg/mL) | <i>S. aureus</i><br>ATCC 29213<br>MIC (µg/mL) |
|-------------|-----------------------------------------------|-----------------------------------------------|
| <b>78a</b>  | 16                                            | 1                                             |
| <b>78b</b>  | >128                                          | >128                                          |
| <b>78c</b>  | 64                                            | >128                                          |
| <b>79a</b>  | 32                                            | 32                                            |
| <b>80a</b>  | >128                                          | 64                                            |
| <b>81a</b>  | 128                                           | 64                                            |
| <b>82a</b>  | >128                                          | >128                                          |
| <b>83a</b>  | >128                                          | >128                                          |
| <b>84a</b>  | 128                                           | >128                                          |
| <b>85a</b>  | >128                                          | >128                                          |
| <b>85b</b>  | 128                                           | 128                                           |
| <b>86b</b>  | 128                                           | 128                                           |
| <b>87b</b>  | >128                                          | >128                                          |
| <b>88a</b>  | >128                                          | >128                                          |
| <b>89a</b>  | 16                                            | >128                                          |
| <b>90a</b>  | 8                                             | >128                                          |
| <b>91a</b>  | 1                                             | >128                                          |
| <b>92b</b>  | >128                                          | >128                                          |
| <b>95a</b>  | 32                                            | >128                                          |
| <b>96a</b>  | 16                                            | 32                                            |
| <b>96b</b>  | >128                                          | >128                                          |
| <b>97a</b>  | >128                                          | >128                                          |
| <b>98a</b>  | >128                                          | >128                                          |
| <b>99a</b>  | >128                                          | >128                                          |
| <b>100a</b> | –                                             | >128                                          |
| <b>101a</b> | 16                                            | 16                                            |
| <b>102a</b> | 128                                           | >128                                          |
| <b>103a</b> | >128                                          | >128                                          |
| <b>104a</b> | 128                                           | >128                                          |
| <b>105a</b> | >128                                          | >128                                          |
| <b>106b</b> | >128                                          | >128                                          |
| <b>107a</b> | >128                                          | >128                                          |

| Compound    | <i>E. faecium</i><br>NCTC 7171<br>MIC (µg/mL) | <i>S. aureus</i><br>ATCC 29213<br>MIC (µg/mL) |
|-------------|-----------------------------------------------|-----------------------------------------------|
| <b>108a</b> | 16                                            | 16                                            |
| <b>108b</b> | 64                                            | >128                                          |
| <b>109b</b> | >128                                          | >128                                          |
| <b>110a</b> | >128                                          | >128                                          |
| <b>111a</b> | >128                                          | >128                                          |
| <b>112a</b> | –                                             | >128                                          |
| <b>113a</b> | 16                                            | 16                                            |
| <b>114b</b> | >128                                          | >128                                          |
| <b>115a</b> | >128                                          | >128                                          |
| <b>116b</b> | >128                                          | >128                                          |
| <b>117a</b> | 64                                            | 64                                            |
| <b>117b</b> | 128                                           | >128                                          |
| <b>118a</b> | 64                                            | 64                                            |
| <b>118b</b> | 128                                           | 128                                           |
| <b>119a</b> | 64                                            | 64                                            |
| <b>120a</b> | 32                                            | 64                                            |
| <b>120b</b> | 128                                           | 128                                           |
| <b>121a</b> | 32                                            | 32                                            |
| <b>121b</b> | 64                                            | 64                                            |

**Plasma protein binding.** Plasma protein binding experiments were performed with a rapid equilibrium dialysis (RED) device (Pierce Biotechnology, Thermo Scientific, Waltham, MA) and human plasma (BioreclamationIVT, Chestertown, MD). Thawed human plasma was centrifuged at 1,000 g for 10 min; the supernatant was removed, aliquoted, and stored at -20 °C until analysis. Working solutions of each compound were prepared at a concentration of 5 mM in DMSO. An aliquot (0.5 µL) of each compound was added to 500 µL of thawed human plasma. A 200-µL aliquot of the plasma-compound mixture (200 µL) was loaded into the sample chamber of the RED device inserts, and 350 µL of phosphate buffered saline (pH 7.4) was loaded into the buffer chamber. Samples were dialyzed at 37 °C with orbital shaking at 300 rpm for 2 h. Subsequently, sample and buffer chamber contents were removed. Buffer chamber contents were typically concentrated 10-fold using a heated, centrifugal concentrator (GeneVac, miVac Duo Concentrator, Ipswich, UK) and subsequently diluted with internal standard and analyzed using ultra performance liquid chromatography (UPLC) with multiple-reaction monitoring (MRM). A 50-µL aliquots from the sample chamber was quenched with 150 µL internal standard solution (1 µg/mL) and was centrifuged (22,000 g for 15 min) with subsequent analysis of the protein-free supernatant using UPLC-MRM. The percent bound was determined following the equations from the RED device manufacturer:

% Free = (Concentration buffer chamber/Concentration plasma chamber) x 100

% Bound = 100 - %Free

**Mass spectrometry and bioanalytical method.** Samples were analyzed on an UPLC system (Waters Corp., Milford, MA) coupled with a triple quadrupole mass spectrometer (TQD, Waters, Milford, MA) operating in MRM mode. Standard curves of each compound were prepared in 50  $\mu$ L of mouse plasma, which were subsequently quenched with 150  $\mu$ L of internal standard in acetonitrile. Samples were centrifuged at 22,000 g for 15 min, and the supernatants were analyzed using UPLC-MRM. Acquisition parameters were as follows: Supelco Ascentis C18 column (3  $\mu$ m particle size, 10 cm  $\times$  2.1 mm; Sigma-Aldrich, St. Louis, MO), electrospray ionization positive mode (ESI+), flow rate 0.5 mL/min, capillary voltage 4 kV, cone voltage 30 V, and collision voltage 25 V. The solvent program was as follows: 95% A-5% B for 0.25 min, 0.75-min linear gradient to 5% A-95% B, hold for 4 min, where A = 0.1% formic acid/water and B = 0.1% formic acid/acetonitrile. The methods were linear between 0-20  $\mu$ M ( $R^2$  values 0.98–0.99). MRM transitions for each compound are listed in the table below. Waters MassLynx software was used to calculate peak areas of the compound relative to those of the internal standard. A standard curve of the ratios plotted against standard concentration was generated, from which compound concentrations were determined using regression parameters.

**Table S3. MRM Transitions for Quantification of Oxadiazoles**

| Compound                 | Precursor $m/z$ | Product $m/z$ |
|--------------------------|-----------------|---------------|
| <b>internal standard</b> | 401.1           | 122.8         |
| <b>59b</b>               | 374.9           | 129.1         |
| <b>60b</b>               | 408.0           | 129.1         |
| <b>61b</b>               | 465.0           | 129.1         |
| <b>62a</b>               | 415.0           | 121.1         |
| <b>69b</b>               | 392.0           | 129.1         |
| <b>72c</b>               | 371.9           | 144.3         |

**XTT assay.** The XTT cytotoxicity assay was carried out in triplicates using HepG2 cells (ATCC HB-8065), by a reported method.<sup>1</sup> The  $IC_{50}$  values were calculated with GraphPad Prism 5 (GraphPad Software, Inc., San Diego, CA).

**Hemolysis.** Hemolysis was performed using human blood by a reported method.<sup>10</sup>

**MIC determination with ESKAPE panel of organisms.** *E. faecium* NCTC (ATCC 19734), *S. aureus* ATCC 29213, *K. pneumoniae* ATCC 700603, *A. baumannii* ATCC 17961, *P. aeruginosa* ATCC 17853, *E. aerogenes* ATCC 35029 and *E. coli* ATCC 25922) were purchased from the American Type Culture Collection (Manassas, VA). We followed a general literature method for determination of the MIC values.<sup>1</sup>

**MIC determination in a broader panel of Gram-positive bacteria.** *S. aureus* ATCC 29213, *S. aureus* ATCC 27660, *S. epidermidis* ATCC 35547, *S. hemolyticus* ATCC 29970, *B. cereus* ATCC 13061, *B. licheniformis* ATCC 12759, *E. faecalis* ATCC 29212, and *E. faecium* NCTC7171 were

purchased from the American Type Culture Collection (Manassas, VA). *S. aureus* strains NRS70, NRS100, NRS119, NRS120, VRS1, and VRS2 were obtained from the Network on Antimicrobial Resistance in Staphylococcus aureus (Chantilly, VA). *E. faecalis* strains 201 and 99, and *E. faecium* strains 119-39A and 106 were collected from Wayne State University School of Medicine. Vancomycin was purchased from Sigma-Aldrich (St. Louis, MO) and linezolid was obtained from AmplaChem Inc, (Carmel, IN). The MICs of the oxadiazoles compared to vancomycin and linezolid, against an extended panel of Gram-positive organisms were determined using the broth microdilution technique according to the Clinical Laboratory Standards Institute (CLSI) guidelines. Cation adjusted Mueller-Hinton II broth (CAMHB-II, Becton Dickinson and Co, Sparks, MD) was used and the experiment was conducted in triplicates.

**Animals.** Female ICR mice (6–8 weeks old, ~20-g body weight, Envigo RMS, Inc. Indianapolis, IN) were used for the PK and mouse peritonitis studies. Animals were given Teklad 2918 Irradiated Rodent Diet (Envigo RMS, Inc. Indianapolis, IN) and water *ad libitum*. Mice were housed in polycarbonate shoebox cages with 1/4 inch corncob (The Andersons Inc., Maumee, OH) and Alpha-dri (Sheperd Specialty Papers, Inc., Richland, MI) bedding at 72 ± 2 °F with a 12-h light/12-h dark cycle. All animal procedures were approved by the University of Notre Dame Institutional Animal Care and Use Committee.

**Dose formulations.** Compound **72c** was dissolved in 10% DMSO/25% Tween-80/65% water at a concentration of 5 mg/mL. The solution was sterilized with an Acrodisc syringe filter (Pall Life Sciences, Ann Arbor, MI) containing a 0.2 µm, 13 mm diameter PTFE membrane.

**Full PK study.** Mice (n = 3 per time point) were administered 100 µL (equivalent to 20 mg/kg) orally (po) of compound **72c** by gavage or intravenously (iv) by tail-vein injection. Terminal blood was collected by cardiac puncture with sodium heparin at the following time points: 0.5, 1, 2, 3, 4, 6, 9, 24, 36 h for po administration and 2, 5, 10, 20, 40 min and 1, 2, 3, 4, 8, 24 h for iv administration. Whole blood was centrifuged at 1000 g for 10 min to obtain plasma. Plasma samples were analyzed the day of collection by UPLC-MRM. The remaining plasma was stored at -80 °C.

**Pharmacokinetic parameters.** Phoenix WinNonlin 6.3 (Certara LP, St Louis, MO) non-compartmental analysis with uniform weighing was used to calculate the area-under-the-curve (AUC), clearance (CL), volume of distribution ( $V_d$ ), and terminal half-lives. Half-lives were estimated from the linear portion of the initial or terminal phase of the concentration–time data by linear regression, where the slope of the line was the rate constant  $k$  and  $t_{1/2} = \ln 2/k$ .

**Mouse peritonitis study.** Compound **72c** was evaluated in a mouse peritonitis model of infection, a simple and widely used model for evaluation of efficacy of drugs with the end points being death or survival. *S. aureus* ATCC 27660 was cultured in brain heart infusion agar overnight and colonies were used to inoculate brain heart infusion broth to an optical density of 0.5 at 540 nm. The inoculum was stored on ice and just prior to infection it was warmed to room temperature and mixed in 1:1 ratio with a sterile suspension of 10% mucin (Sigma-Aldrich Chemical Co., St Louis, MO, USA) in saline to obtain a final bacterial concentration of  $5 \times 10^7$  CFU/mL and 5% mucin. The mice were divided into 3 groups (n = 6 mice per group) and each mouse was injected ip with 0.5 mL of the final bacterial suspension. The mice were treated with **72c** (20 mg/kg), vancomycin (5 mg/kg) or vehicle, at 30 min and 7.5 h after infection given intravenously by tail-vein injection. The animals were monitored for 2 days. Survival was 3 of 6 mice with **72c**, 6 of 6 with vancomycin, and 0 of 6 with vehicle.

**Mouse neutropenic thigh infection study.** Mice (n = 8 per group) were rendered neutropenic by intraperitoneal administration of cyclophosphamide (200 mg/kg) at 4 days and 1 day prior to

infection. MRSA strains NRS70 (linezolid-sensitive) and NRS119 (linezolid-resistant) were injected ( $10^5$  cfu) into the right thighs. A single oral dose at 40 mg/kg of compounds **72c**, **8**, linezolid, or vehicle (10% DMSO/25% Tween-20/65% water) was given by oral gavage 1 h after infection. The infected thighs were harvested at 48 h after infection, homogenized, and plated for colony counts. The uninfected thighs were also harvested, homogenized, and analyzed for drug levels by UPLC with MRM detection. Terminal blood was also collected by cardiac puncture, centrifuged to obtain plasma, and the plasma was analyzed for drug concentrations by UPLC with MRM detection. Drug concentrations are shown in Table S4.

**Table S4. Drug Concentrations in Neutropenic Thigh Infected Mice (n = 8 mice per group)**

| Treatment           | NRS70                       |                                 | NRS119                      |                                 |
|---------------------|-----------------------------|---------------------------------|-----------------------------|---------------------------------|
|                     | Plasma ( $\mu\text{g/mL}$ ) | Thigh ( $\mu\text{g/g}$ tissue) | Plasma ( $\mu\text{g/mL}$ ) | Thigh ( $\mu\text{g/g}$ tissue) |
| Compound <b>8</b>   | $0.91 \pm 0.46$             | $7.6 \pm 2.3$                   | $0.61 \pm 0.29$             | $6.0 \pm 1.2$                   |
| Compound <b>72c</b> | $0.63 \pm 0.18$             | $5.8 \pm 1.4$                   | $0.41 \pm 0.14$             | $6.4 \pm 1.3$                   |
| Linezolid           | NQ <sup>a</sup>             | NQ <sup>a</sup>                 | NQ <sup>a</sup>             | NQ <sup>a</sup>                 |

<sup>a</sup>NQ = non quantifiable

Figure S1. NMR Spectra for Representative Compounds 62a, 60b and 72c

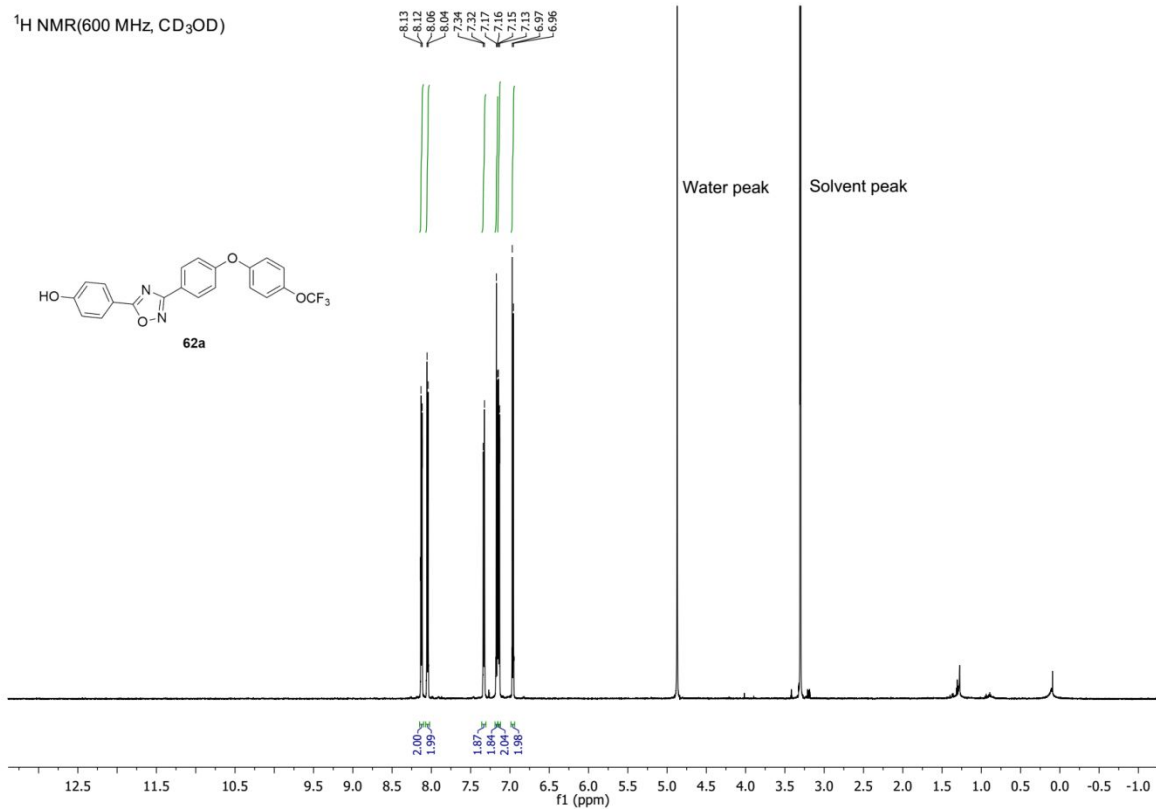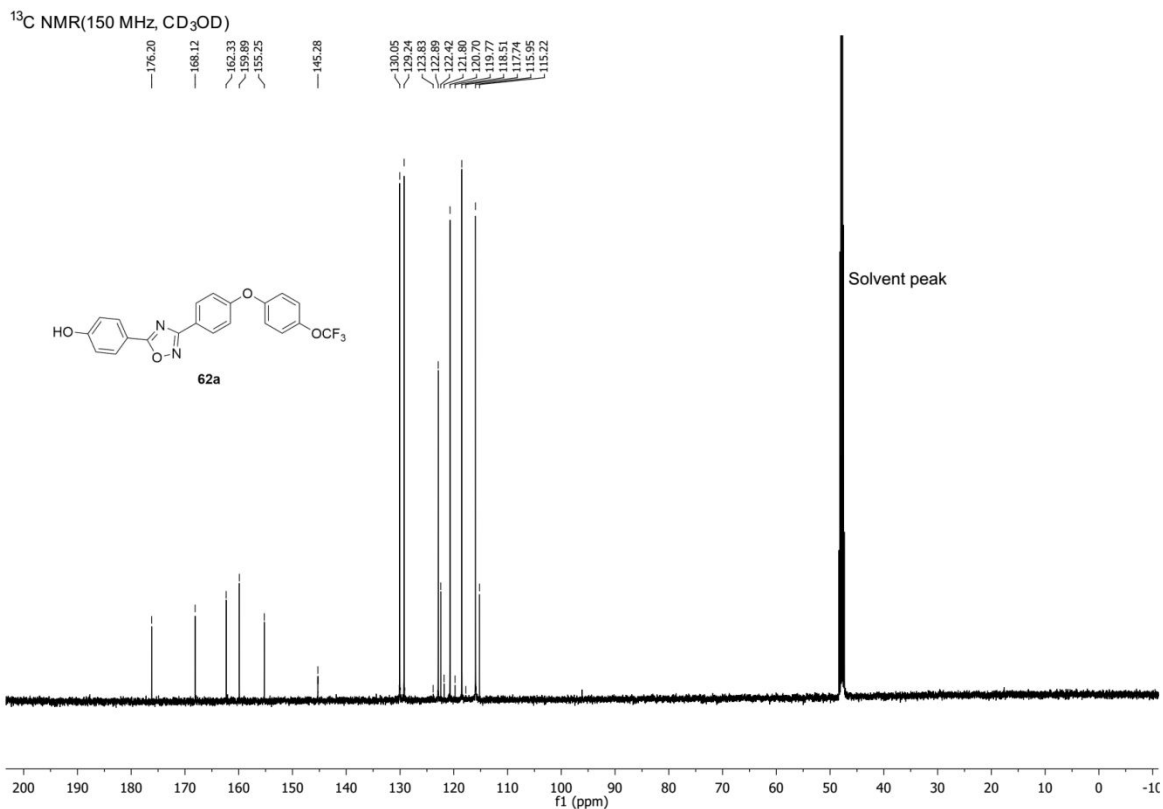

<sup>1</sup>H NMR (500 MHz, DMSO-d<sub>6</sub>)

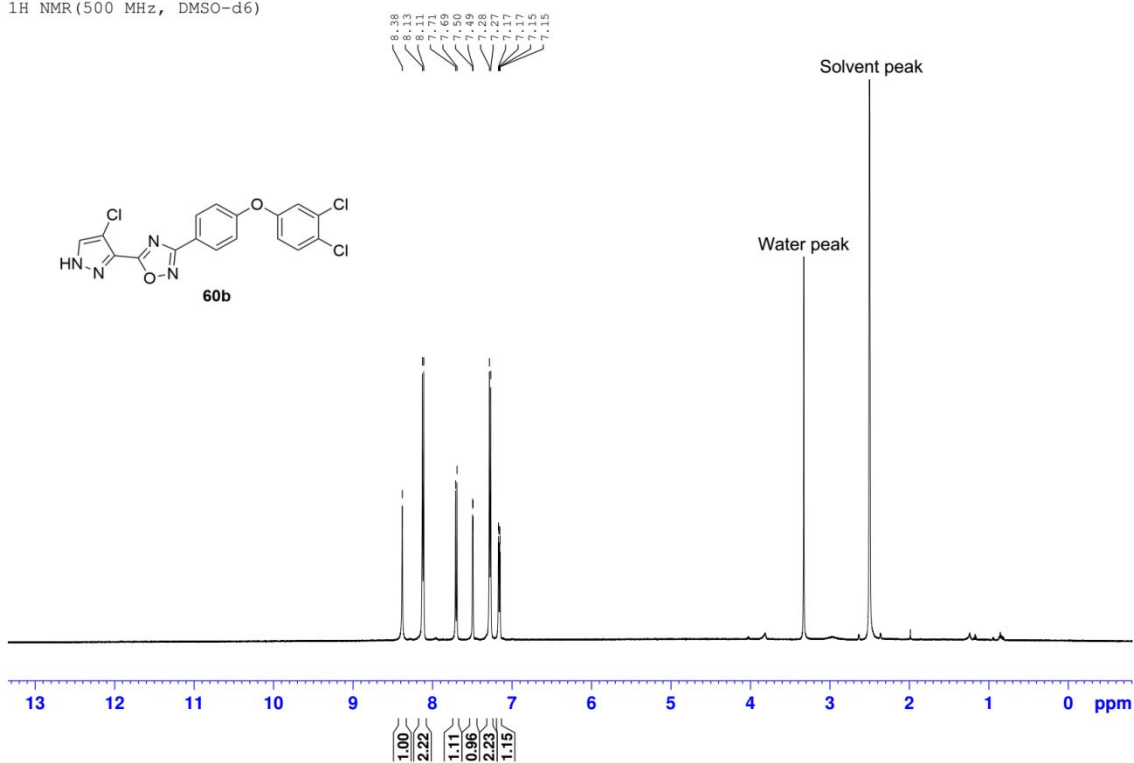

<sup>13</sup>C NMR (125 MHz, DMSO-d<sub>6</sub>)

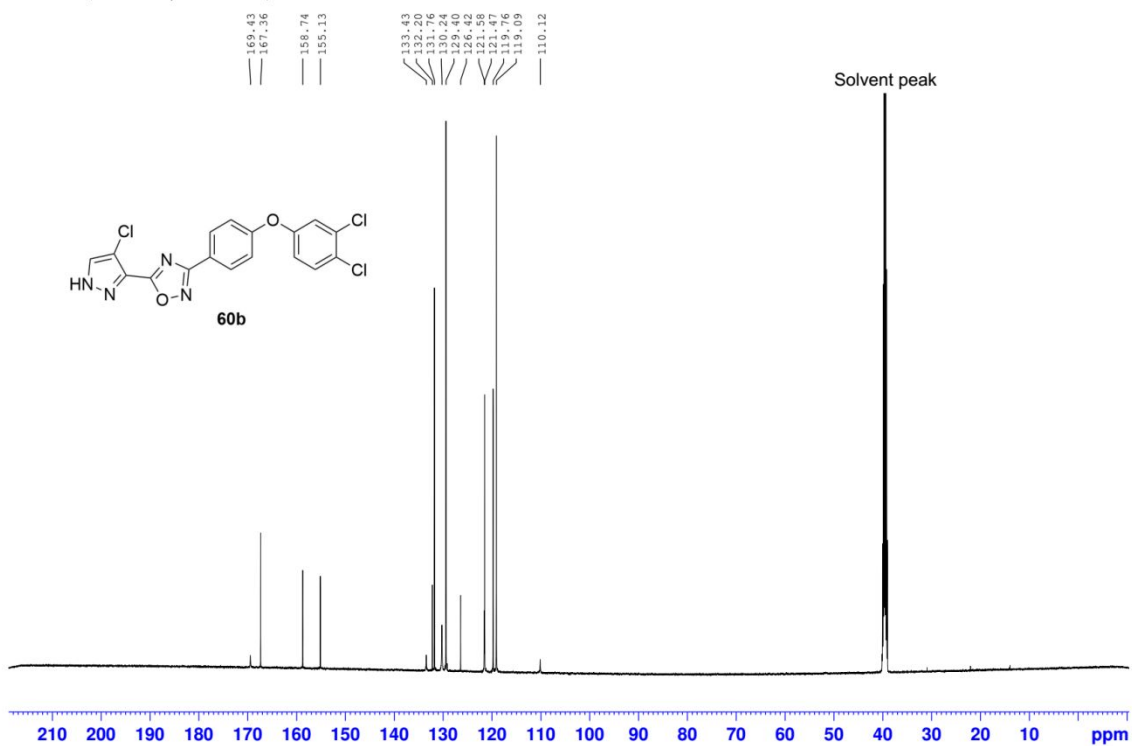



<sup>1</sup>H NMR (400 MHz, DMSO-d<sub>6</sub>)

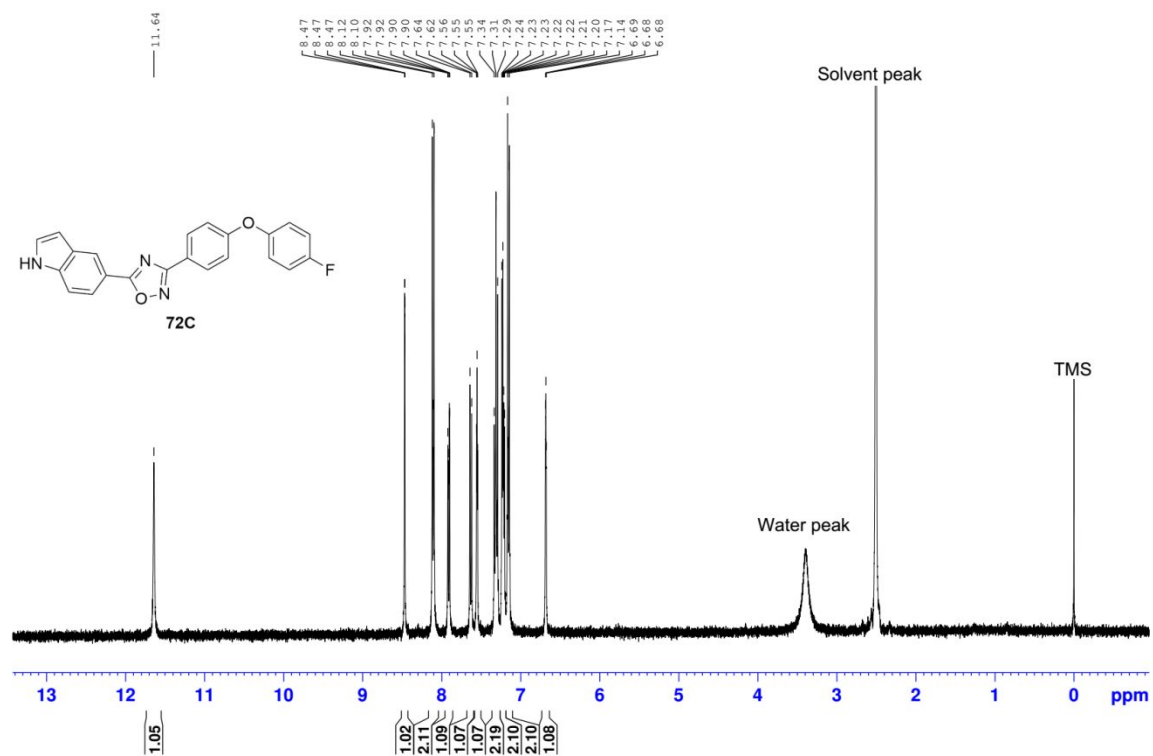

<sup>13</sup>C NMR (125 MHz, DMSO-d<sub>6</sub>)

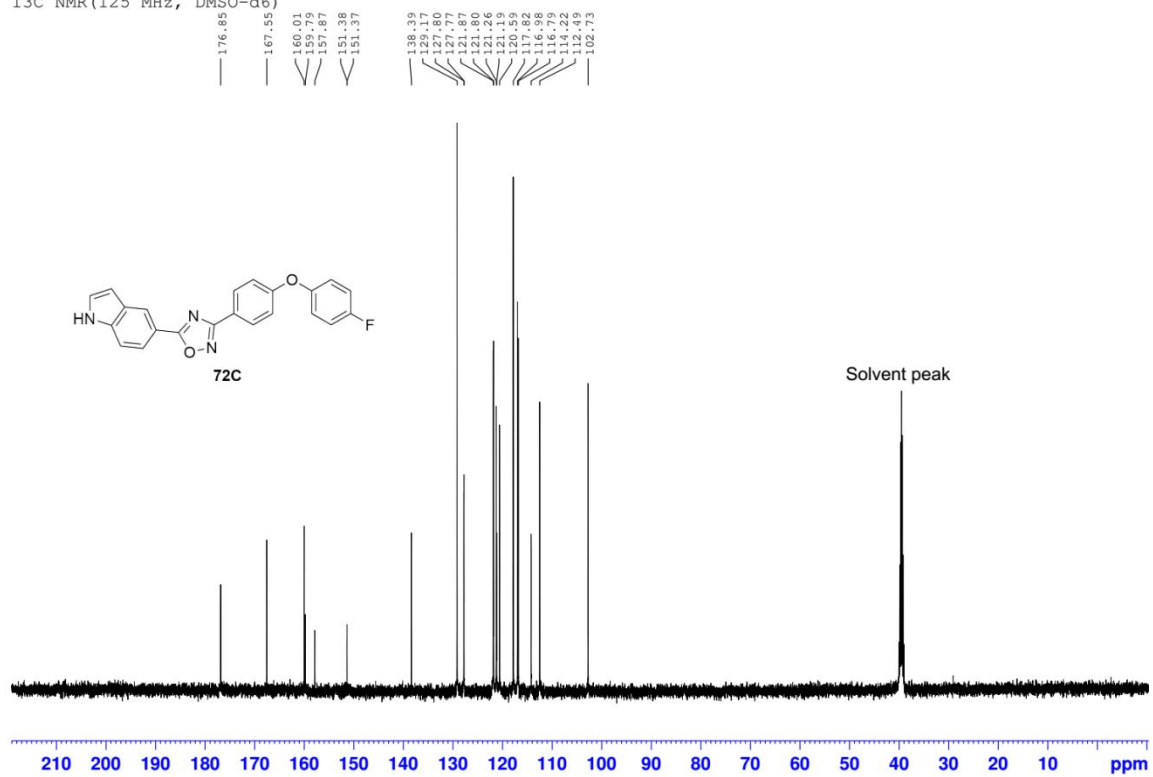

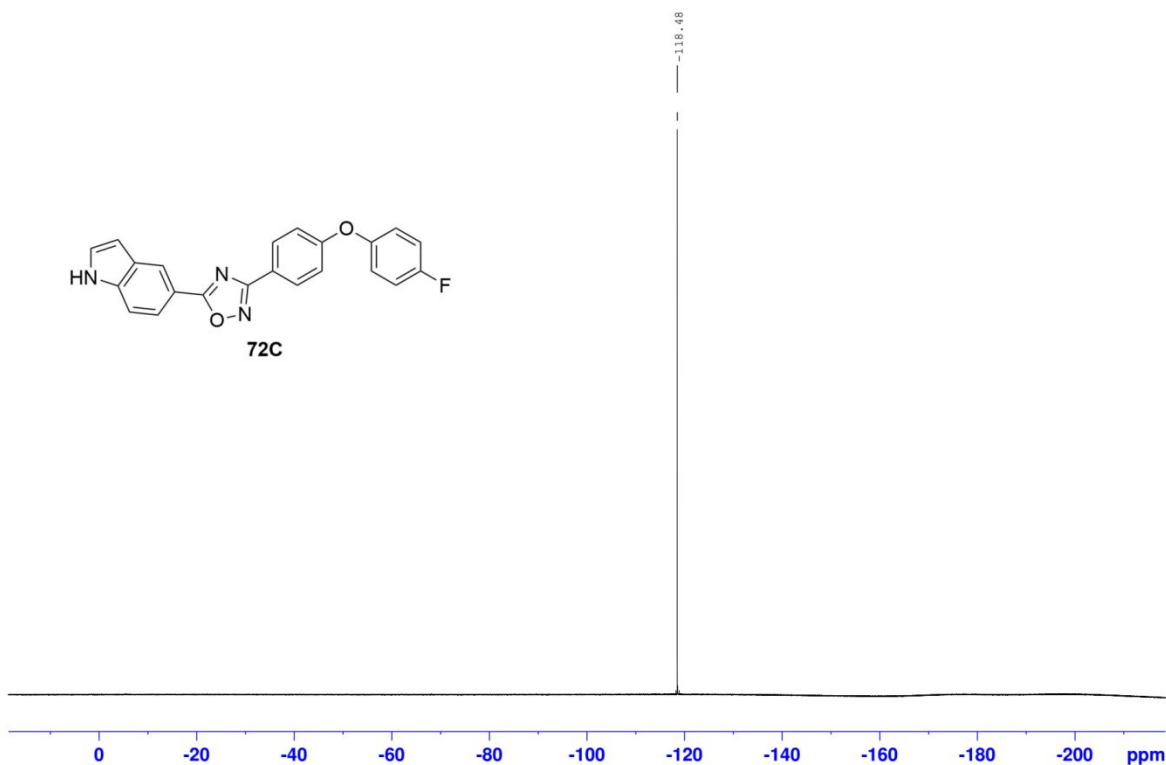

## References

- (1) Yi, B.; Long, S.; González-Cestari, T. F.; Henderson, B. J.; Pavlovicz, R. E.; Werbovetz, K.; Li, C.; McKay, D. B. Discovery of benzamide analogs as negative allosteric modulators of human neuronal nicotinic receptors: Pharmacophore modeling and structure-activity relationship studies. *Bioorg. Med. Chem.* **2013**, *21*, 4730–4743.
- (2) Wilson, S. C.; Howard, P. W.; Thurston, D. E. Design and synthesis of a novel epoxide-containing pyrrolo[2,1-c][1,4]benzodiazepine (PBD) via a new cyclization procedure. *Tetrahedron Lett.* **1995**, *36*, 6333–6336.
- (3) Liu, K.-C.; Fang, J.-M.; Jan, J.-T.; Cheng, T.-J. R.; Wang, S.-Y.; Yang, S.-T.; Cheng, Y.-S. E.; Wong, C.-H. Enhanced anti-influenza agents conjugated with anti-inflammatory activity. *J. Med. Chem.* **2012**, *55*, 8493–8501.
- (4) Coppola, G. M.; Kukkola, P. J.; Stanton, J. L.; Neubert, A. D.; Marcopulos, N.; Bilci, N. A.; Wang, H.; Tomaselli, H. C.; Tan, J.; Aicher, T. D.; Knorr, D. C.; Jeng, A. Y.; Dardik, B.; Chatelain, R. E. Perhydroquinolylbenzamides as novel inhibitors of 11 $\beta$ -hydroxysteroid dehydrogenase type 1. *J. Med. Chem.* **2005**, *48*, 6696–6712.
- (5) Andersen, J.; Madsen, U.; Björkling, F.; Liang, X. Rapid synthesis of aryl azides from aryl halides under mild conditions. *Synlett* **2005**, 2209–2213.
- (6) O'Daniel, P. I.; Peng, Z.; Pi, H.; Testero, S. A.; Ding, D.; Spink, E.; Leemans, E.; Boudreau, M. A.; Yamaguchi, T.; Schroeder, V. A.; Wolter, W. R.; Llarrull, L. I.; Song, W.; Lastochkin, E.; Kumarasiri, M.; Antunes, N. T.; Espahbodi, M.; Lichtenwalter, K.; Suckow, M. A.; Vakulenko, S.; Mobashery, S.; Chang, M. Discovery of a new class of non- $\beta$ -lactam inhibitors of penicillin-binding proteins with gram-positive antibacterial activity. *J. Am. Chem. Soc.* **2014**, *136*, 3664–3672.

- (7) Perez, M.; Lamothe, M.; Maraval, C.; Mirabel, E.; Loubat, C.; Planty, B.; Horn, C.; Michaux, J.; Marrot, S.; Letienne, R.; Pignier, C.; Bocquet, A.; Nadal-Wollbold, F.; Cussac, D.; de Vries, L.; Le Grand, B. Discovery of novel protease activated receptors 1 antagonists with potent antithrombotic activity in vivo. *J. Med. Chem.* **2009**, *52*, 5826–5836.
- (8) Bouley, R.; Kumarasiri, M.; Peng, Z.; Otero, L. H.; Song, W.; Suckow, M. A.; Schroeder, V. A.; Wolter, W. R.; Lastochkin, E.; Antunes, N. T.; Pi, H.; Vakulenko, S.; Hermoso, J. A.; Chang, M.; Mobashery, S. Discovery of antibiotic (E)-3-(3-carboxyphenyl)-2-(4-cyanostyryl)quinazolin-4(3H)-one. *J. Am. Chem. Soc.* **2015**, *137*, 1738–1741.
- (9) Barral, K.; Moorhouse, A. D.; Moses, J. E. Efficient conversion of aromatic amines into azides: A one-pot synthesis of triazole linkages. *Org. Lett.* **2007**, *9*, 1809–1811.
